# Supplementary material for: Gut Microbiota in Dholes During Estrus
Source: Front Microbiol. 2020 Nov 30;11:575731. doi: 10.3389/fmicb.2020.575731 (PMC7734286; doi:10.3389/fmicb.2020.575731)
Supplement: Supplementary file 7 [file Table_7.XLSX]

## Sheet: Sheet1
Table S7: The results of Metastat among the four groups
KEGG--ec level : CH2 VS CH3
Taxa	mean(CH2)	variance(CH2)	standard error(CH2)	mean(CH3)	variance(CH3)	standard error(CH3)	p value	q value
1.17.1.8	0.000347498	1.51515e-10	5.02518e-06	0.000251648	1.97026e-10	5.73042e-06	0	0
3.6.4.13	0.000402564	5.03322e-10	9.15898e-06	0.000303548	1.34802e-10	4.73993e-06	2.42236e-05	0.0161231
1.2.7.5	1.3172e-05	2.86979e-11	2.187e-06	4.40648e-05	5.04813e-11	2.90061e-06	5.83851e-05	0.0194303
6.3.4.2	0.000155201	2.32365e-10	6.22315e-06	6.76694e-05	3.51087e-10	7.64947e-06	4.40994e-05	0.0194303
1.15.1.1	0.000186749	1.2177e-09	1.42461e-05	6.33161e-05	5.49498e-10	9.5699e-06	0.000142857	0.0336635
2.7.1.66	6.0649e-06	3.57078e-11	2.43953e-06	2.648e-05	1.38251e-11	1.51795e-06	0.000157764	0.0336635
3.6.3.28	3.13223e-05	6.31652e-11	3.24462e-06	6.58361e-05	8.18536e-11	3.69354e-06	0.000177019	0.0336635
3.2._._	1.70385e-05	1.02374e-10	4.13065e-06	6.80231e-05	2.33939e-10	6.24418e-06	0.000229193	0.0381372
2.7.1.190	7.87824e-06	7.31484e-11	3.49162e-06	4.09626e-05	1.00722e-10	4.0972e-06	0.000443478	0.0425538
2.7.4.6	0.000174272	1.10199e-09	1.35523e-05	5.4661e-05	1.07875e-09	1.34086e-05	0.000374534	0.0425538
2.7.7.61_2.4.2.52	1.05338e-05	8.82542e-11	3.83524e-06	4.62822e-05	1.18699e-10	4.44783e-06	0.000479503	0.0425538
3.6.3.55	7.92608e-06	2.53686e-11	2.05623e-06	3.30882e-05	7.53243e-11	3.54317e-06	0.000447826	0.0425538
4.1.1.65	0.000257476	1.89065e-09	1.77513e-05	0.000110965	1.57198e-09	1.61863e-05	0.000473292	0.0425538
4.2.1.70	2.90009e-05	3.47818e-10	7.61378e-06	0.000101963	4.47308e-10	8.63431e-06	0.000359006	0.0425538
4.3.2.2	0.000371392	8.34264e-11	3.72886e-06	0.000303488	5.80861e-10	9.83921e-06	0.000316149	0.0425538
2.7.8.41	7.25504e-05	2.51549e-09	2.04755e-05	0.000214711	8.82716e-10	1.21293e-05	0.000519876	0.0432532
4.4.1.11	4.73167e-05	8.84143e-11	3.83871e-06	1.40714e-05	1.09275e-10	4.26762e-06	0.000600621	0.0470317
1.5.1.20	0.000217197	4.36937e-10	8.53363e-06	0.00027409	1.9747e-10	5.73687e-06	0.00074472	0.0472077
1.6.99.3	0.000103622	1.2595e-09	1.44885e-05	1.83706e-05	1.45021e-10	4.91632e-06	0.000729814	0.0472077
2.7.1.95	5.50987e-06	2.98727e-11	2.23132e-06	2.50322e-05	4.35061e-11	2.69277e-06	0.000720497	0.0472077
3.1.3.18	0.000440962	1.60371e-09	1.63489e-05	0.00064574	6.25643e-09	3.22915e-05	0.000675776	0.0472077
2.1.1.187	0.00014558	2.87083e-09	2.1874e-05	0.000288464	1.36625e-09	1.509e-05	0.000870807	0.0483003
2.4.1.__3.4._._	0.000377791	1.7039e-09	1.68518e-05	0.000279222	2.53067e-10	6.49445e-06	0.000804969	0.0483003
2.4.1.208	2.22883e-05	1.45105e-10	4.91774e-06	5.81681e-05	1.18483e-10	4.44378e-06	0.000849068	0.0483003
1.1.1.367	0.000125161	1.21766e-10	4.50492e-06	0.000172185	3.95647e-10	8.12041e-06	0.00117764	0.0498426
1.1.1.69	4.73667e-05	1.50756e-10	5.01258e-06	8.6572e-05	2.06006e-10	5.85955e-06	0.00114845	0.0498426
1.4.3.16	0.000313252	3.35532e-10	7.4781e-06	0.00024974	5.55413e-10	9.62127e-06	0.00102236	0.0498426
2.1.1.13	0.000320704	1.58026e-09	1.62289e-05	0.000409894	3.51853e-10	7.65782e-06	0.00127578	0.0498426
2.1.1.177	0.000349667	9.12492e-10	1.23322e-05	0.000415666	1.91085e-10	5.64336e-06	0.00142298	0.0498426
2.1.2.11	0.000184064	1.43635e-09	1.54723e-05	9.88732e-05	3.92961e-10	8.09281e-06	0.0013913	0.0498426
2.5.1.63	3.18142e-05	2.62134e-10	6.60976e-06	8.13074e-05	2.98084e-10	7.04845e-06	0.00110994	0.0498426
2.6.1.42	0.000251283	8.5029e-10	1.19044e-05	0.000180421	3.70943e-10	7.86281e-06	0.00128012	0.0498426
2.7.7.87	0.00038383	2.92017e-09	2.20612e-05	0.000496055	2.6387e-10	6.63161e-06	0.00140497	0.0498426
2.7.8.33	5.8054e-05	1.4203e-09	1.53856e-05	0.000182947	2.11481e-09	1.87742e-05	0.00108509	0.0498426
3.4.13.19	0.000137776	1.66684e-09	1.66675e-05	0.000257937	1.95986e-09	1.80733e-05	0.00137453	0.0498426
4.1.2.48	0.00022743	4.99717e-10	9.12613e-06	0.000341919	2.85121e-09	2.17991e-05	0.00145404	0.0498426
5.2.1.8	0.00153447	3.36611e-08	7.49012e-05	0.000987177	3.24178e-08	7.35049e-05	0.00101801	0.0498426
5.3.1.12	0.000107078	9.05537e-10	1.22851e-05	0.000177185	3.52515e-10	7.66502e-06	0.00146025	0.0498426
6.4.1.1	0.00027267	3.28579e-09	2.34015e-05	0.000145756	6.36643e-10	1.03008e-05	0.00128447	0.0498426
KEGG--ec level : CH2 VS CJ1
Taxa	mean(CH2)	variance(CH2)	standard error(CH2)	mean(CJ1)	variance(CJ1)	standard error(CJ1)	p value	q value
2.4.1.20	4.21359e-07	5.80569e-14	9.83674e-08	3.93554e-06	1.08921e-12	4.26069e-07	1.7094e-05	0.0234749
5.3.1.31	1.01507e-07	1.51554e-14	5.02583e-08	9.23755e-07	5.81948e-14	9.84841e-08	3.11355e-05	0.0234749
2.7.7.8	0.000465485	1.00713e-10	4.09701e-06	0.000419526	1.73638e-10	5.37956e-06	5.37241e-05	0.0270038
KEGG--ko level : CH2 VS CH3
Taxa	mean(CH2)	variance(CH2)	standard error(CH2)	mean(CH3)	variance(CH3)	standard error(CH3)	p value	q value
K00215	0.000347498	1.51515e-10	5.02518e-06	0.000251648	1.97026e-10	5.73042e-06	0	0
K01937	0.000155201	2.32365e-10	6.22315e-06	6.76694e-05	3.51087e-10	7.64947e-06	1.15286e-05	0.0085484
K01989	0.000222392	1.37607e-09	1.51441e-05	0.000374089	3.45353e-10	7.58675e-06	1.00342e-05	0.0085484
K03471	1.19991e-05	2.19244e-11	1.91156e-06	3.4236e-05	1.92763e-11	1.79241e-06	1.40905e-05	0.0085484
K03614	0.000298561	1.19927e-09	1.41378e-05	0.000441391	4.70747e-10	8.85764e-06	1.345e-05	0.0085484
K03738	1.3172e-05	2.86979e-11	2.187e-06	4.40648e-05	5.04813e-11	2.90061e-06	1.36635e-05	0.0085484
K17074	3.1798e-05	3.12966e-10	7.22226e-06	0.000103135	1.1007e-10	4.28311e-06	1.3877e-05	0.0085484
K02334	0.000209902	9.29768e-10	1.24483e-05	0.000361755	1.47358e-09	1.56715e-05	3.41588e-05	0.00967092
K04088	2.76317e-05	1.67229e-10	5.27934e-06	8.09713e-05	1.19808e-10	4.46855e-06	3.0743e-05	0.00967092
K04767	1.43513e-05	4.23121e-11	2.65556e-06	3.74115e-05	1.2442e-11	1.44002e-06	3.39453e-05	0.00967092
K05592	0.000343001	1.52027e-09	1.59179e-05	0.000205484	3.52399e-10	7.66375e-06	2.92485e-05	0.00967092
K05772	9.36885e-06	3.0615e-11	2.25887e-06	3.62974e-05	3.608e-11	2.45221e-06	2.15628e-05	0.00967092
K07448	7.13407e-05	2.5258e-10	6.4882e-06	0.00012771	4.17979e-11	2.63938e-06	2.28437e-05	0.00967092
K17076	3.3711e-05	2.70598e-10	6.71562e-06	0.000112424	2.93567e-10	6.99485e-06	2.07088e-05	0.00967092
K19126	2.3595e-06	6.52532e-12	1.04286e-06	2.26047e-05	3.27193e-11	2.33521e-06	2.56191e-05	0.00967092
K12137	1.47617e-05	1.7581e-11	1.71177e-06	5.14806e-05	1.31145e-10	4.6752e-06	3.92827e-05	0.0104265
K00887	6.0649e-06	3.57078e-11	2.43953e-06	2.648e-05	1.38251e-11	1.51795e-06	5.72161e-05	0.0115706
K05773	8.91361e-06	2.16845e-11	1.90107e-06	3.59692e-05	6.49629e-11	3.29046e-06	5.50811e-05	0.0115706
K06199	0.000131293	4.44148e-10	8.60376e-06	5.881e-05	1.56735e-10	5.11101e-06	4.88898e-05	0.0115706
K16371	1.48529e-05	5.55998e-11	3.04411e-06	4.5198e-05	5.02477e-11	2.89389e-06	4.97438e-05	0.0115706
K17073	3.26201e-05	5.74769e-10	9.78748e-06	0.000115202	2.27509e-10	6.15777e-06	5.31597e-05	0.0115706
K02041	3.13223e-05	6.31652e-11	3.24462e-06	6.58361e-05	8.18536e-11	3.69354e-06	6.19129e-05	0.0119513
K03976	0.000291819	2.5611e-10	6.53337e-06	0.000374059	5.88849e-10	9.90664e-06	6.59693e-05	0.0121806
K05833	0.000116544	1.80553e-09	1.73471e-05	0.000255182	6.79406e-10	1.06412e-05	7.21605e-05	0.0127686
K05832	0.00017916	1.28524e-09	1.46358e-05	0.000313213	1.18234e-09	1.40377e-05	8.94535e-05	0.014611
K07727	7.60517e-05	2.6814e-10	6.68506e-06	0.000177974	1.14672e-09	1.38246e-05	8.60376e-05	0.014611
K01756	0.000371392	8.34264e-11	3.72886e-06	0.000303488	5.80861e-10	9.83921e-06	0.000103117	0.0157692
K19508	2.02281e-05	1.12561e-10	4.3313e-06	8.33552e-05	4.6235e-10	8.77829e-06	0.000103971	0.0157692
K16329	2.90009e-05	3.47818e-10	7.61378e-06	0.000101963	4.47308e-10	8.63431e-06	0.000118275	0.0173201
K00940	0.000174272	1.10199e-09	1.35523e-05	5.4661e-05	1.07875e-09	1.34086e-05	0.000126174	0.0174663
K01250	9.89627e-06	4.91691e-11	2.86266e-06	4.70746e-05	1.63882e-10	5.22625e-06	0.000135354	0.0174663
K02042	6.0191e-05	1.79989e-10	5.47706e-06	0.000131479	6.09977e-10	1.00828e-05	0.000137703	0.0174663
K17319	0.000175598	2.9912e-09	2.23279e-05	0.000426947	6.82269e-09	3.37211e-05	0.000137489	0.0174663
K19046	2.94407e-06	1.02252e-11	1.30545e-06	2.62811e-05	7.52147e-11	3.54059e-06	0.000139838	0.0174663
K06857	7.92608e-06	2.53686e-11	2.05623e-06	3.30882e-05	7.53243e-11	3.54317e-06	0.000152647	0.0180071
K17910	7.87824e-06	7.31484e-11	3.49162e-06	4.09626e-05	1.00722e-10	4.0972e-06	0.00015158	0.0180071
K01613	0.000257476	1.89065e-09	1.77513e-05	0.000110965	1.57198e-09	1.61863e-05	0.000160547	0.0181807
K13927	1.05338e-05	8.82542e-11	3.83524e-06	4.62822e-05	1.18699e-10	4.44783e-06	0.000162681	0.0181807
K09690	9.54722e-06	3.56959e-11	2.43912e-06	3.52778e-05	7.28385e-11	3.48421e-06	0.000172289	0.0187607
K02245	1.20469e-05	2.74691e-11	2.13967e-06	4.272e-05	1.28747e-10	4.63227e-06	0.000179761	0.0189965
K03925	0.000138051	1.52183e-09	1.5926e-05	0.000258981	9.38971e-10	1.25098e-05	0.000187874	0.0189965
K08744	7.25504e-05	2.51549e-09	2.04755e-05	0.000214711	8.82716e-10	1.21293e-05	0.00018766	0.0189965
K09963	4.09884e-05	6.77194e-10	1.06238e-05	0.000136544	8.88418e-10	1.21684e-05	0.000202818	0.0200306
K00625	0.000327159	1.07703e-09	1.3398e-05	0.000218445	9.81612e-10	1.27907e-05	0.000211358	0.0202485
K08978	8.20497e-05	5.61106e-10	9.67045e-06	0.000200083	1.87804e-09	1.7692e-05	0.00021456	0.0202485
K01761	4.73167e-05	8.84143e-11	3.83871e-06	1.40714e-05	1.09275e-10	4.26762e-06	0.000229078	0.0211486
K04564	0.000171079	2.21418e-09	1.92102e-05	4.86011e-05	5.17126e-10	9.28373e-06	0.000241247	0.0217982
K00297	0.000217197	4.36937e-10	8.53363e-06	0.00027409	1.9747e-10	5.73687e-06	0.000306576	0.0221222
K01091	0.000440962	1.60371e-09	1.63489e-05	0.00064574	6.25643e-09	3.22915e-05	0.000273911	0.0221222
K02109	0.000355286	2.31174e-09	1.96288e-05	0.000178731	3.75037e-09	2.50012e-05	0.000301452	0.0221222
K02566	3.31134e-05	2.03813e-10	5.82827e-06	0.000101829	7.20933e-10	1.09615e-05	0.000305508	0.0221222
K03711	0.000233565	7.58541e-10	1.12438e-05	0.000154412	4.059e-10	8.22496e-06	0.000264944	0.0221222
K03885	0.000103622	1.2595e-09	1.44885e-05	1.83706e-05	1.45021e-10	4.91632e-06	0.000299103	0.0221222
K05569	1.28932e-05	6.34214e-11	3.25119e-06	5.01117e-05	1.92548e-10	5.66492e-06	0.00025854	0.0221222
K06213	0.000322816	3.36708e-09	2.36892e-05	0.000493791	2.26396e-09	1.94249e-05	0.000297182	0.0221222
K06971	1.55834e-05	4.33998e-11	2.68948e-06	5.10198e-05	1.88223e-10	5.60094e-06	0.000255337	0.0221222
K07058	0.000212706	9.75138e-10	1.27485e-05	0.000123145	6.04374e-10	1.00364e-05	0.000311059	0.0221222
K07240	0.000526826	8.60941e-09	3.78801e-05	0.000800467	5.54596e-09	3.04027e-05	0.000279462	0.0221222
K09157	0.000212178	1.75443e-09	1.70999e-05	0.000340359	1.48026e-09	1.5707e-05	0.000310845	0.0221222
K09992	3.32284e-07	7.88548e-14	1.14641e-07	3.14606e-06	1.48295e-12	4.97149e-07	0.000312553	0.0221222
K05366	0.000377791	1.7039e-09	1.68518e-05	0.000279222	2.53067e-10	6.49445e-06	0.000335611	0.0222696
K05567	1.56832e-05	4.40989e-11	2.71105e-06	5.21553e-05	2.21897e-10	6.08135e-06	0.000328992	0.0222696
K18332	4.22901e-05	1.67506e-10	5.28371e-06	0.000110253	7.55502e-10	1.12213e-05	0.000326857	0.0222696
K19124	4.38468e-06	1.14043e-11	1.37866e-06	3.49112e-05	1.75603e-10	5.40991e-06	0.000331554	0.0222696
K13012	2.78793e-05	3.02672e-10	7.10248e-06	7.86068e-05	2.23939e-10	6.10927e-06	0.000354398	0.0224768
K13677	2.22883e-05	1.45105e-10	4.91774e-06	5.81681e-05	1.18483e-10	4.44378e-06	0.000354611	0.0224768
K17320	0.000168295	3.00618e-09	2.23837e-05	0.00034862	3.61199e-09	2.45357e-05	0.00034842	0.0224768
K00563	0.00014558	2.87083e-09	2.1874e-05	0.000288464	1.36625e-09	1.509e-05	0.000366567	0.0228929
K07770	1.21072e-05	2.34554e-11	1.97718e-06	5.27747e-05	3.22533e-10	7.33181e-06	0.000374466	0.0230473
K07037	0.000225599	4.20077e-09	2.64599e-05	6.24362e-05	1.4643e-09	1.56221e-05	0.000391759	0.0237672
K01997	0.000129059	1.70748e-09	1.68695e-05	0.00023823	8.47258e-10	1.18832e-05	0.000405636	0.0242624
K00278	0.000313252	3.35532e-10	7.4781e-06	0.00024974	5.55413e-10	9.62127e-06	0.000444065	0.0259588
K01585	0.000215048	3.84413e-09	2.53118e-05	7.20263e-05	7.02002e-10	1.08167e-05	0.000453032	0.0259588
K09815	0.000229133	4.41191e-09	2.71167e-05	6.9211e-05	1.31337e-09	1.47951e-05	0.00046456	0.0259588
K19123	3.34846e-06	9.98297e-12	1.28989e-06	3.05739e-05	1.55703e-10	5.09416e-06	0.000462212	0.0259588
K19125	3.59012e-06	1.19784e-11	1.41294e-06	3.2032e-05	1.68226e-10	5.29506e-06	0.000456874	0.0259588
K02851	5.8054e-05	1.4203e-09	1.53856e-05	0.000182947	2.11481e-09	1.87742e-05	0.000480999	0.0261882
K09807	6.55838e-06	5.26375e-11	2.96191e-06	2.65769e-05	3.80132e-11	2.51705e-06	0.000476516	0.0261882
K01995	0.000153403	2.5146e-09	2.04719e-05	0.000266925	4.49477e-10	8.65522e-06	0.00050064	0.026248
K03322	2.45393e-05	2.54607e-11	2.05996e-06	9.25726e-06	2.80832e-11	2.16345e-06	0.000498079	0.026248
K09134	3.18142e-05	2.62134e-10	6.60976e-06	8.13074e-05	2.98084e-10	7.04845e-06	0.00049509	0.026248
K00046	4.73667e-05	1.50756e-10	5.01258e-06	8.6572e-05	2.06006e-10	5.85955e-06	0.000515798	0.026713
K19068	0.000125161	1.21766e-10	4.50492e-06	0.000172185	3.95647e-10	8.12041e-06	0.000529889	0.0271121
K00548	0.000320704	1.58026e-09	1.62289e-05	0.000409894	3.51853e-10	7.65782e-06	0.000582408	0.0276187
K00826	0.000251283	8.5029e-10	1.19044e-05	0.000180421	3.70943e-10	7.86281e-06	0.000584543	0.0276187
K02897	0.000170197	2.20897e-09	1.91875e-05	5.80766e-05	8.01084e-10	1.15548e-05	0.000559991	0.0276187
K03092	0.000276636	3.70337e-09	2.48441e-05	0.000145103	4.93017e-10	9.06474e-06	0.000580487	0.0276187
K04087	2.24761e-05	2.12871e-10	5.95638e-06	7.502e-05	4.49336e-10	8.65386e-06	0.00056234	0.0276187
K05520	6.35615e-06	9.68543e-12	1.27053e-06	1.92342e-05	3.11264e-11	2.27766e-06	0.000604825	0.0276187
K05568	5.30904e-05	4.05723e-10	8.22317e-06	0.000143631	1.60468e-09	1.63538e-05	0.000600128	0.0276187
K09163	6.43741e-05	1.09767e-09	1.35257e-05	0.000150175	6.9815e-10	1.0787e-05	0.000590734	0.0276187
K15923	0.000224945	1.70763e-09	1.68702e-05	0.000116062	1.16155e-09	1.39137e-05	0.000576217	0.0276187
K17992	2.36016e-05	7.68082e-11	3.5779e-06	7.29735e-05	5.22416e-10	9.33109e-06	0.000603757	0.0276187
K07473	0.000217233	2.00788e-09	1.82934e-05	0.000408804	7.12443e-09	3.44587e-05	0.00062468	0.0282219
K00606	0.000184064	1.43635e-09	1.54723e-05	9.88732e-05	3.92961e-10	8.09281e-06	0.000650299	0.0287672
K01273	0.000137776	1.66684e-09	1.66675e-05	0.000257937	1.95986e-09	1.80733e-05	0.000645602	0.0287672
K00783	0.000349667	9.12492e-10	1.23322e-05	0.000415666	1.91085e-10	5.64336e-06	0.000664816	0.0288092
K07566	0.00038383	2.92017e-09	2.20612e-05	0.000496055	2.6387e-10	6.63161e-06	0.000658198	0.0288092
K01620	0.00022743	4.99717e-10	9.12613e-06	0.000341919	2.85121e-09	2.17991e-05	0.000685098	0.029176
K01812	0.000107078	9.05537e-10	1.22851e-05	0.000177185	3.52515e-10	7.66502e-06	0.00068702	0.029176
K07138	5.8599e-05	1.00495e-09	1.29418e-05	0.0001798	2.77725e-09	2.15145e-05	0.000698762	0.0293808
K09777	8.21892e-05	4.13114e-10	8.29773e-06	0.00015876	1.10038e-09	1.35424e-05	0.000706234	0.0294039
K00261	2.65622e-06	1.76845e-12	5.42901e-07	6.04692e-06	1.22758e-12	4.52323e-07	0.000726516	0.0299546
K01998	0.000161002	2.92665e-09	2.20856e-05	0.000272022	3.38445e-10	7.5105e-06	0.000764518	0.0312184
K01665	0.000129311	1.64835e-09	1.65748e-05	3.87942e-05	5.3499e-10	9.44272e-06	0.000778822	0.0314996
K00020	1.7485e-05	1.21429e-10	4.49869e-06	5.62225e-05	2.86614e-10	6.91151e-06	0.000818958	0.0319573
K03300	7.21717e-06	4.00513e-11	2.58364e-06	2.68191e-05	6.44765e-11	3.27812e-06	0.000820239	0.0319573
K03570	0.000271665	1.30914e-09	1.47713e-05	0.00018215	8.46633e-10	1.18788e-05	0.000798249	0.0319573
K07273	0.000170603	2.96074e-09	2.22139e-05	5.89607e-05	4.03563e-10	8.20125e-06	0.000805508	0.0319573
K01996	0.000129957	2.45369e-09	2.02225e-05	0.000237511	7.42958e-10	1.11277e-05	0.000852904	0.0320986
K02622	0.000226066	3.48018e-09	2.40838e-05	0.000102595	7.28704e-10	1.10205e-05	0.000848634	0.0320986
K07040	0.000162547	1.74083e-09	1.70334e-05	0.000276391	1.84759e-09	1.7548e-05	0.000856319	0.0320986
K19427	2.92546e-06	3.72216e-12	7.8763e-07	8.0326e-06	3.50918e-12	7.64764e-07	0.000861657	0.0320986
K19507	1.19488e-05	5.40258e-11	3.00072e-06	5.0056e-05	3.47863e-10	7.61427e-06	0.000855252	0.0320986
K07166	0.000160817	1.74751e-09	1.70661e-05	0.000260258	1.04313e-09	1.31854e-05	0.000904996	0.0334199
K02621	0.000211748	2.38286e-09	1.99285e-05	0.000108173	6.55069e-10	1.04488e-05	0.000914603	0.0334835
K00981	0.000360431	1.92644e-10	5.66633e-06	0.000256284	2.90471e-09	2.20027e-05	0.000932963	0.0335767
K17214	3.33927e-06	7.93057e-12	1.14968e-06	1.60537e-05	3.81395e-11	2.52123e-06	0.000928266	0.0335767
K00832	3.27825e-05	2.06807e-10	5.87093e-06	7.45955e-05	2.98391e-10	7.05208e-06	0.000961785	0.0343231
K01270	0.000522711	4.19894e-09	2.64542e-05	0.000359945	3.50857e-09	2.41818e-05	0.000979505	0.0346642
K03305	0.000190742	3.30391e-09	2.3466e-05	6.30121e-05	1.46461e-09	1.56238e-05	0.00099509	0.0349247
K01299	9.45619e-05	8.47857e-10	1.18874e-05	0.000211484	3.17479e-09	2.30029e-05	0.00102071	0.0351434
K07586	1.29574e-05	2.64636e-11	2.10014e-06	4.8702e-05	3.51536e-10	7.65437e-06	0.00103523	0.0351434
K10563	2.035e-05	6.31409e-11	3.24399e-06	5.925e-05	3.82926e-10	7.98881e-06	0.00102519	0.0351434
K11924	1.78626e-06	4.66789e-12	8.82033e-07	1.3499e-05	3.60169e-11	2.45006e-06	0.0010427	0.0351434
K18889	1.5125e-05	5.71301e-11	3.08572e-06	5.74064e-05	4.71641e-10	8.86605e-06	0.00103459	0.0351434
K13789	0.000296904	3.207e-10	7.31095e-06	0.00034141	2.67826e-10	6.68114e-06	0.00105167	0.0351666
K03648	0.000301941	8.63273e-10	1.19949e-05	0.000246376	5.72236e-11	3.08825e-06	0.00106127	0.0352106
K01181	2.10922e-07	2.07843e-14	5.88563e-08	2.42714e-06	1.46098e-12	4.93454e-07	0.00109671	0.0358266
K05571	1.86208e-05	4.2934e-11	2.67501e-06	4.42359e-05	1.54196e-10	5.06945e-06	0.00108945	0.0358266
K18890	1.38607e-05	4.43589e-11	2.71903e-06	5.36416e-05	4.35641e-10	8.52096e-06	0.00110974	0.0359753
K02005	0.000316417	8.65874e-09	3.79885e-05	0.000128958	2.06295e-09	1.85425e-05	0.00112511	0.0361973
K02044	3.97287e-05	8.61424e-11	3.78907e-06	6.99934e-05	1.96222e-10	5.71871e-06	0.00116161	0.036548
K02057	0.000513334	3.57814e-08	7.72242e-05	0.000890956	8.17818e-09	3.69192e-05	0.00116183	0.036548
K17467	4.75904e-06	9.19884e-12	1.2382e-06	1.05833e-05	1.23957e-12	4.54527e-07	0.0011535	0.036548
K00602	0.000456014	5.27685e-10	9.37803e-06	0.000406286	2.36243e-10	6.27486e-06	0.00117122	0.0365726
K00243	0.000308125	6.32216e-10	1.0265e-05	0.000173957	4.98372e-09	2.88205e-05	0.0012009	0.0371595
K09817	0.000239182	3.3224e-09	2.35315e-05	0.000126924	6.1924e-10	1.01591e-05	0.00120751	0.0371595
K18987	9.94282e-07	8.6223e-13	3.79084e-07	4.74409e-06	3.54403e-12	7.68552e-07	0.00121691	0.0371791
K01835	0.000395453	3.64689e-09	2.46539e-05	0.000518434	1.1313e-09	1.37314e-05	0.00124637	0.0378073
K00426	0.000188891	5.09097e-09	2.91289e-05	5.31754e-05	9.08783e-10	1.23071e-05	0.00136422	0.0382853
K01186	0.000150581	1.36642e-09	1.50909e-05	6.46713e-05	9.90293e-10	1.28471e-05	0.00128416	0.0382853
K02033	0.000258835	1.7781e-08	5.4438e-05	0.000512316	3.1688e-09	2.29811e-05	0.00136529	0.0382853
K02203	5.20559e-06	5.05805e-12	9.18155e-07	1.85414e-05	5.31655e-11	2.97673e-06	0.00138301	0.0382853
K02564	0.000346433	3.68992e-10	7.84211e-06	0.000392577	3.09619e-10	7.18353e-06	0.0012769	0.0382853
K02770	7.14539e-06	4.34335e-11	2.69052e-06	2.70866e-05	8.63408e-11	3.79343e-06	0.00136956	0.0382853
K03426	0.00015763	5.14572e-10	9.26077e-06	0.0001134	1.14969e-10	4.37738e-06	0.00131832	0.0382853
K03615	0.000384328	3.45537e-09	2.39978e-05	0.000514516	2.08647e-09	1.86479e-05	0.00137639	0.0382853
K05846	1.6128e-05	2.627e-10	6.61689e-06	5.99397e-05	3.56938e-10	7.71296e-06	0.00132985	0.0382853
K06941	0.000551768	2.62319e-08	6.6121e-05	0.000951284	2.57218e-08	6.5475e-05	0.00136123	0.0382853
K07043	0.000102688	1.41433e-09	1.53532e-05	0.000178751	4.8239e-10	8.96651e-06	0.00138834	0.0382853
K07074	1.05298e-05	1.41491e-11	1.53564e-06	1.95382e-05	1.20667e-11	1.41814e-06	0.00133262	0.0382853
K09000	1.60784e-06	5.25476e-13	2.95938e-07	1.71177e-07	1.45489e-13	1.55718e-07	0.00135397	0.0382853
K10709	4.48407e-06	1.34965e-11	1.49981e-06	1.7377e-05	3.99143e-11	2.57922e-06	0.00131341	0.0382853
K00425	0.000204025	5.76974e-09	3.10101e-05	5.9312e-05	1.16337e-09	1.39246e-05	0.00144257	0.0387536
K00702	4.21359e-07	5.80569e-14	9.83674e-08	2.39289e-06	1.23082e-12	4.5292e-07	0.00145132	0.0387536
K06902	9.09183e-05	3.43347e-09	2.39217e-05	0.000205217	8.98587e-10	1.22378e-05	0.00145196	0.0387536
K12952	5.48102e-05	2.47137e-09	2.02952e-05	0.000157875	1.05086e-09	1.32341e-05	0.00145111	0.0387536
K15583	8.90814e-05	6.77764e-09	3.36096e-05	0.000256402	2.52317e-09	2.05068e-05	0.00146008	0.0387536
K16328	4.50239e-05	1.65528e-09	1.66096e-05	0.000128434	6.45714e-10	1.0374e-05	0.00143681	0.0387536
K01918	0.000208332	2.15451e-09	1.89495e-05	0.000115796	7.12424e-10	1.08967e-05	0.00148847	0.0390195
K08316	2.28647e-05	4.51722e-10	8.67681e-06	6.83458e-05	2.40691e-10	6.33366e-06	0.00148826	0.0390195
K03048	1.35642e-05	2.91552e-11	2.20436e-06	5.04005e-05	4.31745e-10	8.48278e-06	0.00155316	0.0391779
K04094	9.53169e-05	5.69109e-10	9.73917e-06	0.000192291	2.61523e-09	2.08775e-05	0.00153779	0.0391779
K07082	0.000303607	2.1287e-10	5.95637e-06	0.00025278	6.63902e-10	1.0519e-05	0.00154868	0.0391779
K09124	1.05982e-05	1.36062e-11	1.50589e-06	3.52346e-06	3.32964e-12	7.44943e-07	0.00153544	0.0391779
K09384	2.98617e-05	3.11487e-10	7.20517e-06	6.22827e-05	4.26772e-11	2.66699e-06	0.00151985	0.0391779
K09704	8.83798e-05	8.84072e-10	1.21386e-05	3.16141e-05	2.02134e-10	5.80423e-06	0.0015205	0.0391779
K10823	0.000114209	9.93856e-09	4.06992e-05	0.000313158	3.5296e-09	2.42542e-05	0.00156426	0.0391779
K19545	0.000572222	4.96825e-09	2.87757e-05	0.000869866	2.5208e-08	6.48177e-05	0.00156832	0.0391779
K02038	0.000343911	1.84269e-09	1.75247e-05	0.000432875	9.0272e-10	1.22659e-05	0.00165329	0.041059
K16917	4.41298e-05	6.1454e-10	1.01204e-05	9.60035e-05	3.26631e-10	7.37825e-06	0.00168894	0.0417006
K03654	0.00057191	2.23227e-08	6.09955e-05	0.000255898	1.27754e-08	4.61437e-05	0.00170666	0.0418945
K02121	0.000111849	1.57682e-10	5.12643e-06	5.6977e-05	9.02639e-10	1.22654e-05	0.00171926	0.0419612
K13889	3.09729e-06	8.69433e-12	1.20377e-06	1.00657e-05	8.47382e-12	1.1884e-06	0.00173868	0.0421929
K02034	0.000257661	1.56827e-08	5.11251e-05	0.000477558	1.523e-09	1.59322e-05	0.00176623	0.0426177
K00390	2.88063e-05	2.8265e-11	2.17045e-06	7.86604e-05	8.69535e-10	1.20384e-05	0.0018576	0.0440712
K00737	2.3357e-07	1.12382e-14	4.32785e-08	9.55163e-07	1.76298e-13	1.71415e-07	0.0018386	0.0440712
K02823	0.000315581	2.22471e-09	1.92558e-05	0.000409109	9.31697e-10	1.24613e-05	0.00185461	0.0440712
K03797	0.00067186	2.75967e-08	6.78192e-05	0.000365722	6.33309e-09	3.24887e-05	0.00187212	0.0441689
K10773	0.000383984	6.57316e-10	1.04667e-05	0.00043653	3.47298e-10	7.60808e-06	0.00189624	0.0444909
K03718	0.000226124	8.35701e-09	3.73207e-05	5.72481e-05	2.15826e-09	1.8966e-05	0.00198783	0.0462143
K07047	0.000146201	1.17114e-08	4.41804e-05	0.00035281	4.04109e-09	2.59522e-05	0.00199146	0.0462143
K07126	2.23283e-05	1.9532e-10	5.70555e-06	0.000104002	2.2744e-09	1.94696e-05	0.00201281	0.0464559
K15581	7.81357e-05	4.56226e-09	2.75749e-05	0.000199638	9.66305e-10	1.26906e-05	0.00208006	0.0477485
K15738	0.000297107	1.24934e-09	1.44299e-05	0.000220092	9.88961e-10	1.28385e-05	0.00211763	0.0483497
K01686	0.000128604	8.32304e-10	1.17778e-05	0.00020251	1.2506e-09	1.44372e-05	0.00217229	0.0493324
K00014	0.0002961	7.38338e-10	1.10931e-05	0.00024481	2.77421e-10	6.79977e-06	0.00224424	0.0498989
K00971	0.000386061	2.37235e-08	6.28802e-05	0.000119825	3.54282e-09	2.42996e-05	0.00222652	0.0498989
K15582	7.89153e-05	5.21517e-09	2.94821e-05	0.000209151	1.29489e-09	1.46907e-05	0.00220986	0.0498989
K18816	7.21068e-07	1.41798e-13	1.5373e-07	9.384e-06	2.88091e-11	2.19124e-06	0.00223997	0.0498989
KEGG--level 2 : CH2 VS CH3
Taxa	mean(CH2)	variance(CH2)	standard error(CH2)	mean(CH3)	variance(CH3)	standard error(CH3)	p value	q value
Cellular_Processes_Cell_growth_and_death	0.00417394	4.78515e-09	2.82405e-05	0.00385767	7.10339e-09	3.44078e-05	0	0
Cellular_Processes_Cellular_community	0.00822655	1.54146e-06	0.000506862	0.0101616	1.5488e-07	0.000160665	0.00338636	0.00976225
Cellular_Processes_Transport_and_catabolism	0.0019224	3.75619e-07	0.000250206	0.000934374	8.33452e-08	0.00011786	0.00379545	0.00976225
Human_Diseases_Infectious_diseases_Bacterial	0.00335743	6.68656e-08	0.000105566	0.00295381	4.05673e-09	2.60023e-05	0.00284091	0.00976225
Metabolism_Biosynthesis_of_other_secondary_metabolites	0.00540445	4.02373e-08	8.18915e-05	0.00498549	3.55299e-08	7.69522e-05	0.00265909	0.00976225
Metabolism_Glycan_biosynthesis_and_metabolism	0.0121048	2.21129e-06	0.000607082	0.00929197	1.49645e-06	0.000499407	0.00375	0.00976225
Organismal_Systems_Digestive_system	0.000301553	2.54809e-08	6.51675e-05	9.23633e-05	4.18529e-09	2.64111e-05	0.0100682	0.0221968
Metabolism_Energy_metabolism	0.0230698	1.18383e-06	0.00044419	0.02142	1.15036e-06	0.000437866	0.0191818	0.037003
Human_Diseases_Neurodegenerative_diseases	0.000630239	1.89253e-08	5.61624e-05	0.00048766	1.33049e-09	1.48912e-05	0.0279545	0.0479344
Environmental_Information_Processing_Membrane_transport	0.0208902	1.82672e-05	0.00174486	0.0253933	4.29791e-06	0.000846356	0.0349545	0.0490397
Metabolism_Metabolism_of_cofactors_and_vitamins	0.0264664	1.15687e-06	0.000439103	0.0240948	4.8861e-06	0.000902413	0.0325	0.0490397
KEGG--level 2 : CH2 VS CJ1
Taxa	mean(CH2)	variance(CH2)	standard error(CH2)	mean(CJ1)	variance(CJ1)	standard error(CJ1)	p value	q value
Metabolism_Biosynthesis_of_other_secondary_metabolites	0.00540445	4.02e-08	8.19e-05	0.00486374	4.82e-08	8.97e-05	0.00109091	0.0444798
KEGG--level 3 : CH2 VS CH3
Taxa	mean(CH2)	variance(CH2)	standard error(CH2)	mean(CH3)	variance(CH3)	standard error(CH3)	p value	q value
ko01503	0.00168889	3.43629e-08	7.56779e-05	0.00108418	1.93664e-08	5.68131e-05	0.000137255	0.042584
ko04211	0.000140699	1.21047e-09	1.42037e-05	4.32861e-05	2.77154e-10	6.79649e-06	0.000172549	0.042584
CAZy-- ec level: CH2 VS CH3
Taxa	mean(CH2)	variance(CH2)	standard error(CH2)	mean(CH3)	variance(CH3)	standard error(CH3)	p value	q value
2_hydroxyacylsphingosine_1_beta__galactosyltransferase_EC_2.4.1.45	2.34315e-05	2.22511e-10	6.08976e-06	7.24909e-05	1.79008e-10	5.46212e-06	0.000243056	0.00199581
N_acylsphingosine_galactosyltransferase_EC_2.4.1.47	2.34315e-05	2.22511e-10	6.08976e-06	7.24909e-05	1.79008e-10	5.46212e-06	0.000243056	0.00199581
UDP_beta__L_rhamnose_alpha__L_rhamnosyltransferase_EC_2.4.1._	2.34315e-05	2.22511e-10	6.08976e-06	7.24909e-05	1.79008e-10	5.46212e-06	0.000243056	0.00199581
UDP_Glc_4_hydroxybenzoate_4_O_beta__glucosyltransferase_EC_2.4.1.194	2.34315e-05	2.22511e-10	6.08976e-06	7.24909e-05	1.79008e-10	5.46212e-06	0.000243056	0.00199581
UDP_Glc_chalcone_4?_O_beta__glucosyltransferase_EC_2.4.1.286	2.34315e-05	2.22511e-10	6.08976e-06	7.24909e-05	1.79008e-10	5.46212e-06	0.000243056	0.00199581
UDP_GlcA_baicalein_7_O_beta__glucuronosyltransferase_EC_2.4.1.253	2.34315e-05	2.22511e-10	6.08976e-06	7.24909e-05	1.79008e-10	5.46212e-06	0.000243056	0.00199581
UDP_glucuronosyltransferase_EC_2.4.1.17	2.34315e-05	2.22511e-10	6.08976e-06	7.24909e-05	1.79008e-10	5.46212e-06	0.000224537	0.00199581
anthocyanidin_3_O_glucosyltransferase_EC_2.4.1.115	2.34315e-05	2.22511e-10	6.08976e-06	7.24909e-05	1.79008e-10	5.46212e-06	0.000224537	0.00199581
anthocyanin_3_O_galactosyltransferase_EC_2.4.1._	2.34315e-05	2.22511e-10	6.08976e-06	7.24909e-05	1.79008e-10	5.46212e-06	0.000243056	0.00199581
anthocyanin_5_O_glucosyltransferase_EC_2.4.1._	2.34315e-05	2.22511e-10	6.08976e-06	7.24909e-05	1.79008e-10	5.46212e-06	0.000243056	0.00199581
dTDP_beta__2_deoxy_L_fucose_alpha__L_2_deoxyfucosyltransferase_EC_2.4.1._	2.34315e-05	2.22511e-10	6.08976e-06	7.24909e-05	1.79008e-10	5.46212e-06	0.000243056	0.00199581
ecdysteroid_UDP_glucosyltransferase_EC_2.4.1._	2.34315e-05	2.22511e-10	6.08976e-06	7.24909e-05	1.79008e-10	5.46212e-06	0.000243056	0.00199581
flavonol_3_O_glucosyltransferase_EC_2.4.1.91	2.34315e-05	2.22511e-10	6.08976e-06	7.24909e-05	1.79008e-10	5.46212e-06	0.000224537	0.00199581
flavonol_L_rhamnosyltransferase_EC_2.4.1.159	2.34315e-05	2.22511e-10	6.08976e-06	7.24909e-05	1.79008e-10	5.46212e-06	0.000243056	0.00199581
indole_3_acetate_beta__glucosyltransferase_EC_2.4.1.121	2.34315e-05	2.22511e-10	6.08976e-06	7.24909e-05	1.79008e-10	5.46212e-06	0.000243056	0.00199581
limonoid_glucosyltransferase_EC_2.4.1.210	2.34315e-05	2.22511e-10	6.08976e-06	7.24909e-05	1.79008e-10	5.46212e-06	0.000243056	0.00199581
murein_polymerase_EC_2.4.1.129	0.0005206	4.09289e-09	2.6118e-05	0.000282055	1.78177e-09	1.72326e-05	4.39815e-05	0.00199581
salicylic_acid_beta__glucosyltransferase_EC_2.4.1._	2.34315e-05	2.22511e-10	6.08976e-06	7.24909e-05	1.79008e-10	5.46212e-06	0.000243056	0.00199581
sinapate_1_glucosyltransferase_EC_2.4.1.120	2.34315e-05	2.22511e-10	6.08976e-06	7.24909e-05	1.79008e-10	5.46212e-06	0.000224537	0.00199581
sterol_glucosyltransferase_EC_2.4.1.173	2.34315e-05	2.22511e-10	6.08976e-06	7.24909e-05	1.79008e-10	5.46212e-06	0.000243056	0.00199581
zeatin_O_beta__glucosyltransferase_EC_2.4.1.203	2.34315e-05	2.22511e-10	6.08976e-06	7.24909e-05	1.79008e-10	5.46212e-06	0.000243056	0.00199581
zeatin_O_beta__xylosyltransferase_EC_2.4.2.40	2.34315e-05	2.22511e-10	6.08976e-06	7.24909e-05	1.79008e-10	5.46212e-06	0.000243056	0.00199581
zeaxanthin_glucosyltransferase_EC_2.4.1._	2.34315e-05	2.22511e-10	6.08976e-06	7.24909e-05	1.79008e-10	5.46212e-06	0.000243056	0.00199581
alpha__1_2_L_fucosidase_EC_3.2.1.63	0.000160278	4.52242e-10	8.68181e-06	7.646e-05	7.28249e-10	1.1017e-05	0.000326389	0.00256842
alpha__N_acetylgalactosaminidase_EC_3.2.1.49	0.000350861	1.49654e-08	4.99422e-05	0.000147824	1.35324e-09	1.5018e-05	0.00289815	0.0102622
alpha__glucosyltransferase_EC_2.4.1.52	0.00128883	4.52948e-08	8.68858e-05	0.000916287	9.96128e-09	4.07457e-05	0.00303704	0.0102622
alpha__mannosidase_EC_3.2.1.24	0.000609101	4.79022e-08	8.93515e-05	0.000217164	1.25096e-08	4.5661e-05	0.00286111	0.0102622
beta__xylosidase_EC_3.2.1.37	0.000427837	1.3118e-08	4.67583e-05	0.000686817	1.33344e-08	4.71423e-05	0.00286806	0.0102622
1_2_diacylglycerol_3_glucosyltransferase_EC_2.4.1.157	0.00128883	4.52948e-08	8.68858e-05	0.000916287	9.96128e-09	4.07457e-05	0.00303704	0.0102622
4_O_methyl_glucuronoyl_methylesterase_EC_3.1.1._	1.24029e-06	5.78696e-13	3.10563e-07	5.47995e-06	4.36325e-12	8.52765e-07	0.00141898	0.0102622
ADP_Glc_starch_glucosyltransferase_EC_2.4.1.21	0.000242975	4.45952e-10	8.62122e-06	0.000308419	1.22092e-09	1.42649e-05	0.00283333	0.0102622
GDP_Man_Man1GlcNAc2_PP_dolichol_alpha__1_3_mannosyltransferase_EC_2.4.1.132	0.00128883	4.52948e-08	8.68858e-05	0.000916287	9.96128e-09	4.07457e-05	0.00303704	0.0102622
GDP_Man_Man2GlcNAc2_PP_dolichol_alpha__1_6_mannosyltransferase_EC_2.4.1.257	0.00128883	4.52948e-08	8.68858e-05	0.000916287	9.96128e-09	4.07457e-05	0.00308333	0.0102622
GDP_Man_Man3GlcNAc2_PP_dolichol_Man4GlcNAc2_PP_dolichol_alpha__1_2_mannosyltransferase_EC_2.4.1.131	0.00128883	4.52948e-08	8.68858e-05	0.000916287	9.96128e-09	4.07457e-05	0.00303704	0.0102622
NDP_Glc_alpha__glucose_alpha__glucosyltransferase___alpha__alpha__trehalose_synthase_EC_2.4.1.245	0.00128883	4.52948e-08	8.68858e-05	0.000916287	9.96128e-09	4.07457e-05	0.00301852	0.0102622
NDP_Glc_starch_glucosyltransferase_EC_2.4.1.242	0.000242975	4.45952e-10	8.62122e-06	0.000308419	1.22092e-09	1.42649e-05	0.00283333	0.0102622
UDP_Gal_alpha__galactosyltransferase_EC_2.4.1._	0.00128883	4.52948e-08	8.68858e-05	0.000916287	9.96128e-09	4.07457e-05	0.00300926	0.0102622
UDP_Glc_alpha__glucosyltransferase_EC_2.4.1._	0.00128883	4.52948e-08	8.68858e-05	0.000916287	9.96128e-09	4.07457e-05	0.00303704	0.0102622
UDP_Glc_alpha__1_3_glucan_synthase_EC_2.4.1.183_	0.000242975	4.45952e-10	8.62122e-06	0.000308419	1.22092e-09	1.42649e-05	0.00283333	0.0102622
UDP_Glc_alpha__1_4_glucan_synthase_EC_2.4.1._	0.000242975	4.45952e-10	8.62122e-06	0.000308419	1.22092e-09	1.42649e-05	0.00284722	0.0102622
UDP_Glc_glycogen_glucosyltransferase_EC_2.4.1.11	0.000242975	4.45952e-10	8.62122e-06	0.000308419	1.22092e-09	1.42649e-05	0.00284722	0.0102622
UDP_GlcA_alpha__glucuronyltransferase_EC_2.4.1._	0.00128883	4.52948e-08	8.68858e-05	0.000916287	9.96128e-09	4.07457e-05	0.00300463	0.0102622
UDP_GlcNAc_2_deoxystreptamine_alpha__N_acetylglucosaminyltransferase_EC_2.4.1.283	0.00128883	4.52948e-08	8.68858e-05	0.000916287	9.96128e-09	4.07457e-05	0.00303704	0.0102622
UDP_GlcNAc_ribostamycin_alpha__N_acetylglucosaminyltransferase_EC_2.4.1.285	0.00128883	4.52948e-08	8.68858e-05	0.000916287	9.96128e-09	4.07457e-05	0.00307407	0.0102622
UDP_Xyl_alpha__xylosyltransferase_EC_2.4.2._	0.00128883	4.52948e-08	8.68858e-05	0.000916287	9.96128e-09	4.07457e-05	0.00303241	0.0102622
digalactosyldiacylglycerol_synthase_EC_2.4.1.141	0.00128883	4.52948e-08	8.68858e-05	0.000916287	9.96128e-09	4.07457e-05	0.00302778	0.0102622
diglucosyl_diacylglycerol_synthase_EC_2.4.1.208	0.00128883	4.52948e-08	8.68858e-05	0.000916287	9.96128e-09	4.07457e-05	0.00301852	0.0102622
endo_beta__N_acetylglucosaminidase_EC_3.2.1.96	0.000237861	1.77994e-09	1.72237e-05	0.000155394	6.59599e-10	1.04849e-05	0.00239815	0.0102622
endoglucanase_EC_3.2.1.4	3.43221e-05	1.63374e-10	5.21814e-06	5.65423e-05	1.93045e-11	1.79372e-06	0.0025787	0.0102622
exo_alpha__1_6_mannosidase_EC_3.2.1._	6.78992e-05	5.47128e-10	9.54924e-06	2.06045e-05	8.68199e-11	3.80394e-06	0.00146065	0.0102622
mannosyl_oligosaccharide_alpha__1_2_mannosidase_EC_3.2.1.113	0.000486995	3.87574e-08	8.03715e-05	0.00013999	9.29753e-09	3.93648e-05	0.00309259	0.0102622
mannosyl_oligosaccharide_alpha__1_3_mannosidase_EC_3.2.1._	0.000486995	3.87574e-08	8.03715e-05	0.00013999	9.29753e-09	3.93648e-05	0.00309722	0.0102622
phosphatidylinositol_alpha__mannosyltransferase_EC_2.4.1.57	0.00128883	4.52948e-08	8.68858e-05	0.000916287	9.96128e-09	4.07457e-05	0.00303704	0.0102622
sucrose_synthase_EC_2.4.1.13	0.00128883	4.52948e-08	8.68858e-05	0.000916287	9.96128e-09	4.07457e-05	0.0030787	0.0102622
sucrose_phosphate_synthase_EC_2.4.1.14	0.00128883	4.52948e-08	8.68858e-05	0.000916287	9.96128e-09	4.07457e-05	0.00301389	0.0102622
trehalose_phosphorylase_EC_2.4.1.231	0.00128883	4.52948e-08	8.68858e-05	0.000916287	9.96128e-09	4.07457e-05	0.00303704	0.0102622
Others	0.85582	0.000187321	0.00558751	0.881129	4.2532e-05	0.00266246	0.00241667	0.0102622
beta__glucosidase_EC_3.2.1.21	0.000820538	1.02421e-08	4.13161e-05	0.00101964	6.29265e-09	3.23848e-05	0.00343519	0.0109433
CMP_beta__KDO_alpha__3_deoxy_D_manno_octulosonic_acid_KDO_transferase_EC_2.4.99._	0.000200869	7.88372e-09	3.62485e-05	5.1188e-05	1.74453e-09	1.70515e-05	0.00363889	0.0109433
N_acetyl_1_D_myo_inosityl_2_amino_2_deoxy_alpha__D_glucopyranoside_deacetylase_EC_3.5.1.89	1.29558e-05	2.19485e-11	1.91261e-06	2.82997e-05	7.96339e-11	3.64312e-06	0.00365046	0.0109433
diacetylchitobiose_deacetylase_EC_3.5.1._	1.29558e-05	2.19485e-11	1.91261e-06	2.82997e-05	7.96339e-11	3.64312e-06	0.00365046	0.0109433
mycothiol_S_conjugate_amidase_EC_3.5.1._	1.29558e-05	2.19485e-11	1.91261e-06	2.82997e-05	7.96339e-11	3.64312e-06	0.00365046	0.0109433
polyprenol_P_Man_alpha__1_2_mannosyltransferase_EC_2.4.1.__	2.3458e-06	2.22542e-12	6.09018e-07	1.29962e-05	4.45091e-11	2.72363e-06	0.00341667	0.0109433
N_acetyl_beta__glucosaminidase_EC_3.2.1.52	0.000145968	4.84203e-09	2.84078e-05	3.15878e-05	1.11705e-09	1.36446e-05	0.00419213	0.0121804
protein_3_O_GlcNAc_L_Ser_Thr_beta__N_acetylglucosaminidase_EC_3.2.1.169	0.000145968	4.84203e-09	2.84078e-05	3.15878e-05	1.11705e-09	1.36446e-05	0.00419213	0.0121804
amylopullulanase_EC_3.2.1.41	0.00010387	2.28848e-09	1.95298e-05	2.74934e-05	4.08197e-10	8.2482e-06	0.00438889	0.0125589
alpha__glucosidase_EC_3.2.1.20	0.00153165	4.57518e-08	8.7323e-05	0.00119484	7.76192e-09	3.59674e-05	0.00467361	0.013174
lipid_A_disaccharide_synthase_EC_2.4.1.182	0.000200178	9.1434e-09	3.90372e-05	4.86894e-05	1.77609e-09	1.72051e-05	0.00485648	0.0134882
hyaluronidase_EC_3.2.1.35	0.000277371	1.95751e-08	5.71185e-05	5.99171e-05	3.11013e-09	2.27674e-05	0.00509954	0.013958
alpha__L_fucosidase_EC_3.2.1.51	0.000544739	2.04716e-08	5.84117e-05	0.000304921	9.97847e-09	4.07808e-05	0.0069213	0.0140215
alpha__amylase_EC_3.2.1.1	0.00120425	2.28496e-08	6.17112e-05	0.000958705	7.34602e-09	3.49905e-05	0.00571296	0.0140215
alpha__galactosidase_EC_3.2.1.22	0.000561021	3.80211e-08	7.96043e-05	0.000260298	6.99464e-09	3.41434e-05	0.00558796	0.0140215
beta__1_4_galactosyltransferase_EC_2.4.1._	0.000130475	1.2147e-09	1.42285e-05	0.00019168	7.56818e-10	1.1231e-05	0.00686343	0.0140215
beta__D_fucosidase_EC_3.2.1.38	0.000245127	1.24196e-08	4.54965e-05	0.000501538	2.26869e-08	6.1491e-05	0.00709954	0.0140215
beta__glycosidase_EC_3.2.1._	0.000245127	1.24196e-08	4.54965e-05	0.000501538	2.26869e-08	6.1491e-05	0.00706713	0.0140215
4_alpha__glucanotransferase_EC_2.4.1.25	0.00120425	2.28496e-08	6.17112e-05	0.000958705	7.34602e-09	3.49905e-05	0.00572222	0.0140215
6_phospho_beta__galactosidase_EC_3.2.1.85	0.000245127	1.24196e-08	4.54965e-05	0.000501538	2.26869e-08	6.1491e-05	0.00706713	0.0140215
ABA_specific_beta__glucosidase_EC_3.2.1.175	0.000245127	1.24196e-08	4.54965e-05	0.000501538	2.26869e-08	6.1491e-05	0.00706713	0.0140215
DIMBOA_beta__glucosidase_EC_3.2.1.182	0.000245127	1.24196e-08	4.54965e-05	0.000501538	2.26869e-08	6.1491e-05	0.00712731	0.0140215
UDP_Glc_beta__1_4_glucosyltransferase_EC_2.4.1._	0.000130475	1.2147e-09	1.42285e-05	0.00019168	7.56818e-10	1.1231e-05	0.00686806	0.0140215
UDP_ManNAc_beta__N_acetyl_mannosaminyltransferase_EC_2.4.1._	0.000130475	1.2147e-09	1.42285e-05	0.00019168	7.56818e-10	1.1231e-05	0.00686806	0.0140215
UDP_ManNAcA_beta__N_acetyl_mannosaminuronyltransferase_EC_2.4.1._	0.000130475	1.2147e-09	1.42285e-05	0.00019168	7.56818e-10	1.1231e-05	0.00686806	0.0140215
amygdalin_beta__glucosidase_EC_3.2.1.117	0.000245127	1.24196e-08	4.54965e-05	0.000501538	2.26869e-08	6.1491e-05	0.00709491	0.0140215
amylo_alpha__1_6_glucosidase_EC_3.2.1.33	0.00120661	2.26455e-08	6.14349e-05	0.000964047	7.76506e-09	3.59747e-05	0.00625463	0.0140215
branching_enzyme_EC_2.4.1.18	0.00120425	2.28496e-08	6.17112e-05	0.000958705	7.34602e-09	3.49905e-05	0.00572222	0.0140215
cyclomaltodextrinase_EC_3.2.1.54	0.00120425	2.28496e-08	6.17112e-05	0.000958705	7.34602e-09	3.49905e-05	0.00571296	0.0140215
exo_beta__1_4_glucanase_EC_3.2.1.74	0.000245127	1.24196e-08	4.54965e-05	0.000501538	2.26869e-08	6.1491e-05	0.00712269	0.0140215
hydroxyisourate_hydrolase_EC_3._._._	0.000245127	1.24196e-08	4.54965e-05	0.000501538	2.26869e-08	6.1491e-05	0.00710417	0.0140215
isoflavonoid_7_O_beta__apiosyl_beta__glucosidase_EC_3.2.1.161	0.000245127	1.24196e-08	4.54965e-05	0.000501538	2.26869e-08	6.1491e-05	0.00712731	0.0140215
lactase_EC_3.2.1.108	0.000245127	1.24196e-08	4.54965e-05	0.000501538	2.26869e-08	6.1491e-05	0.00710417	0.0140215
phlorizin_hydrolase_EC_3.2.1.62	0.000245127	1.24196e-08	4.54965e-05	0.000501538	2.26869e-08	6.1491e-05	0.00710417	0.0140215
prunasin_beta__glucosidase_EC_3.2.1.118	0.000245127	1.24196e-08	4.54965e-05	0.000501538	2.26869e-08	6.1491e-05	0.00711806	0.0140215
raucaffricine_beta__glucosidase_EC_3.2.1.125	0.000245127	1.24196e-08	4.54965e-05	0.000501538	2.26869e-08	6.1491e-05	0.00709028	0.0140215
strictosidine_beta__glucosidase_EC_3.2.1.105	0.000245127	1.24196e-08	4.54965e-05	0.000501538	2.26869e-08	6.1491e-05	0.00706713	0.0140215
thioglucosidase_EC_3.2.1.147	0.000245127	1.24196e-08	4.54965e-05	0.000501538	2.26869e-08	6.1491e-05	0.00708565	0.0140215
vicianin_hydrolase_EC_3.2.1.119	0.000245127	1.24196e-08	4.54965e-05	0.000501538	2.26869e-08	6.1491e-05	0.00712731	0.0140215
beta__agarase_EC_3.2.1.81	0.000131403	5.60734e-09	3.05705e-05	2.86137e-05	5.30675e-10	9.40456e-06	0.00843519	0.014352
beta__porphyranase_EC_3.2.1.178	0.000131403	5.60734e-09	3.05705e-05	2.86137e-05	5.30675e-10	9.40456e-06	0.00843519	0.014352
kappa__carrageenase_EC_3.2.1.83	0.000131403	5.60734e-09	3.05705e-05	2.83293e-05	5.40869e-10	9.49447e-06	0.0083912	0.014352
2_keto_3_deoxynononic_acid_sialidase_EC_3.2.1._	0.000215189	1.22908e-08	4.526e-05	6.30599e-05	1.03475e-09	1.31323e-05	0.00827315	0.014352
UDP_3_0_acyl_N_acetylglucosamine_deacetylase_EC_3.5.1._	0.000317793	2.4203e-09	2.00844e-05	0.00021557	3.51852e-09	2.42161e-05	0.00799537	0.014352
chitin_beta__1_6_glucanosyltransferase_EC_2.4.1._	0.000131403	5.60734e-09	3.05705e-05	2.83293e-05	5.40869e-10	9.49447e-06	0.0083912	0.014352
endo_beta__1_3_galactanase_EC_3.2.1.181	0.000131403	5.60734e-09	3.05705e-05	2.83293e-05	5.40869e-10	9.49447e-06	0.0083912	0.014352
endo_beta__1_4_galactosidase_EC_3.2.1._	0.000131403	5.60734e-09	3.05705e-05	2.83293e-05	5.40869e-10	9.49447e-06	0.0083912	0.014352
endo_1_34_beta__glucanase_EC_3.2.1.6	0.000131403	5.60734e-09	3.05705e-05	2.83293e-05	5.40869e-10	9.49447e-06	0.0083912	0.014352
endo_1_3_beta__glucanase_EC_3.2.1.39	0.000131403	5.60734e-09	3.05705e-05	2.83293e-05	5.40869e-10	9.49447e-06	0.0083912	0.014352
glycosphingolipid_beta__N_acetylgalactosaminidase_EC_3.2.1._	0.0001028	2.53917e-09	2.05717e-05	3.18128e-05	3.39859e-10	7.52616e-06	0.0081088	0.014352
keratan_sulfate_endo_1_4_beta__galactosidase_EC_3.2.1.103	0.000131403	5.60734e-09	3.05705e-05	2.83293e-05	5.40869e-10	9.49447e-06	0.0083912	0.014352
sialidase_or_neuraminidase_EC_3.2.1.18	0.000215189	1.22908e-08	4.526e-05	6.30599e-05	1.03475e-09	1.31323e-05	0.00827315	0.014352
trans_sialidase_EC_2.4.1._	0.000215189	1.22908e-08	4.526e-05	6.30599e-05	1.03475e-09	1.31323e-05	0.00827315	0.014352
xyloglucanxyloglucosyltransferase_EC_2.4.1.207	0.000131403	5.60734e-09	3.05705e-05	2.83293e-05	5.40869e-10	9.49447e-06	0.0083912	0.014352
glycogen_synthase_EC_2.4.1.11	8.5708e-05	2.07425e-09	1.85932e-05	2.17244e-05	3.38749e-10	7.51387e-06	0.00906944	0.0152934
xyloglucanase_EC_3.2.1.151	0.000135393	6.0575e-09	3.17739e-05	3.02429e-05	6.1626e-10	1.01346e-05	0.00991204	0.0165663
beta__primeverosidase_EC_3.2.1.149	0.000414558	7.70457e-09	3.58343e-05	0.000638666	2.31718e-08	6.21447e-05	0.0103079	0.0170767
GDP_L_Fuc_beta__LacNac_alpha__1_3_L_fucosyltransferase_EC_2.4.1._	8.39869e-05	2.71932e-09	2.1289e-05	1.48513e-05	2.62869e-10	6.61903e-06	0.0106435	0.0171807
GDP_L_Fuc_galactoside_alpha__1_2_L_fucosyltransferase_EC_2.4.1.69	8.39869e-05	2.71932e-09	2.1289e-05	1.48513e-05	2.62869e-10	6.61903e-06	0.0106435	0.0171807
N_acetylmuramidase_EC_3.2.1.17	9.00965e-05	2.82448e-09	2.16967e-05	1.97858e-05	2.32603e-10	6.22633e-06	0.0104699	0.0171807
6_phospho_beta__glucosidase_EC_3.2.1.86	0.000295958	1.58398e-08	5.13807e-05	0.000590059	3.99571e-08	8.16058e-05	0.0112824	0.0180576
alpha__1_3_galactosidase_EC_3.2.1._	0.000132322	5.98361e-09	3.15795e-05	2.87584e-05	1.01887e-09	1.30312e-05	0.0115417	0.0181647
glucoamylase_EC_3.2.1.3	0.000149066	7.30433e-09	3.48911e-05	3.55543e-05	1.05842e-09	1.32817e-05	0.0114676	0.0181647
beta__galactosidase_EC_3.2.1.23	0.000322203	1.57794e-08	5.12826e-05	0.000590588	3.19182e-08	7.29363e-05	0.0120069	0.0187408
licheninase_EC_3.2.1.73	0.000306848	1.10599e-08	4.29338e-05	0.000170312	1.3278e-09	1.48762e-05	0.0121551	0.0188165
alpha__1_2_mannosidase_EC_3.2.1._	0.000444641	6.24045e-08	0.000101984	0.000113093	1.14434e-08	4.36719e-05	0.0127338	0.0189501
alpha__1_3_mannosidase_EC_3.2.1._	0.000444641	6.24045e-08	0.000101984	0.000113093	1.14434e-08	4.36719e-05	0.0127431	0.0189501
alpha__1_4_mannosidase_EC_3.2.1._	0.000444641	6.24045e-08	0.000101984	0.000113093	1.14434e-08	4.36719e-05	0.0127431	0.0189501
mannosyl_1_phosphodiester_alpha__1_P_mannosidase_EC_3.2.1._	0.000444641	6.24045e-08	0.000101984	0.000113093	1.14434e-08	4.36719e-05	0.0127338	0.0189501
mannosyl_oligosaccharide_alpha__1_6_mannosidase_EC_3.2.1._	0.000444641	6.24045e-08	0.000101984	0.000113093	1.14434e-08	4.36719e-05	0.0127431	0.0189501
lipopolysaccharide_N_acetylglucosaminyltransferase_EC_2.4.1.56	0.00171318	1.44697e-07	0.000155294	0.00118464	4.97388e-08	9.10484e-05	0.0138125	0.02038
alpha__1_3_glucosidase_EC_3.2.1.84	0.000231612	4.43204e-09	2.71786e-05	0.00013957	1.74365e-09	1.70472e-05	0.01575	0.0217968
alpha__1_4_N_acetylgalactosaminyltransferase_EC_2.4.1._	9.29901e-05	2.72335e-11	2.13047e-06	0.00011572	3.60447e-10	7.75077e-06	0.017081	0.0217968
alpha__1_4_N_acetylglucosaminyltransferase_EC_2.4.1._	9.29901e-05	2.72335e-11	2.13047e-06	0.00011572	3.60447e-10	7.75077e-06	0.0170764	0.0217968
alpha__1_6_mannosyltransferase_EC_2.4.1._	9.29901e-05	2.72335e-11	2.13047e-06	0.00011572	3.60447e-10	7.75077e-06	0.0170671	0.0217968
beta__1_6_N_acetylglucosaminidase_EC_3.2.1._	0.000766262	1.47893e-07	0.000156999	0.000282777	2.49327e-08	6.44628e-05	0.0166551	0.0217968
beta__6_SO3_N_acetylglucosaminidase_EC_3.2.1._	0.000766262	1.47893e-07	0.000156999	0.000282777	2.49327e-08	6.44628e-05	0.0166505	0.0217968
beta__L_arabinopyranosidase_EC_3.2.1.88	5.8489e-05	1.42488e-09	1.54104e-05	1.26099e-05	1.18205e-10	4.43856e-06	0.0161852	0.0217968
beta__hexosaminidase_EC_3.2.1.52	0.000766262	1.47893e-07	0.000156999	0.000282777	2.49327e-08	6.44628e-05	0.0166551	0.0217968
GDP_Man_inositol_phosphorylceramide_transferase_EC_2.4.1._	9.29901e-05	2.72335e-11	2.13047e-06	0.00011572	3.60447e-10	7.75077e-06	0.0170625	0.0217968
UDP_Gal_beta__galactoside_alpha__1_4_galactosyltransferase_EC_2.4.1._	9.29901e-05	2.72335e-11	2.13047e-06	0.00011572	3.60447e-10	7.75077e-06	0.0170671	0.0217968
UDP_Gal_lactose_N_acetyl_lactosamine_alpha__1_4_galactosyltransferase_EC_2.4.1._	9.29901e-05	2.72335e-11	2.13047e-06	0.00011572	3.60447e-10	7.75077e-06	0.017081	0.0217968
cellobiohydrolase_EC_3.2.1.91	1.12544e-05	2.58953e-11	2.07747e-06	4.54964e-06	6.65037e-12	1.0528e-06	0.0155694	0.0217968
dodecaprenyl_phosphate_beta__galacturonic_acid_lipopolysaccharide_core_alpha__galacturonosyl_transferase_EC_2.4.1._	0.000123489	5.93042e-09	3.14389e-05	2.60211e-05	1.1458e-09	1.38191e-05	0.0168681	0.0217968
endo_beta__1_34_glucanase___lichenase_laminarinase_EC_3.2.1.6	1.12544e-05	2.58953e-11	2.07747e-06	4.54964e-06	6.65037e-12	1.0528e-06	0.0155694	0.0217968
galactangalactan_galactosyltransferase_EC_2.4.1._	5.8489e-05	1.42488e-09	1.54104e-05	1.26099e-05	1.18205e-10	4.43856e-06	0.0161852	0.0217968
isomalto_dextranase_EC_3.2.1.94	5.8489e-05	1.42488e-09	1.54104e-05	1.26099e-05	1.18205e-10	4.43856e-06	0.0161944	0.0217968
lacto_N_biosidase_EC_3.2.1.140	0.000766262	1.47893e-07	0.000156999	0.000282777	2.49327e-08	6.44628e-05	0.0166551	0.0217968
lichenase___endo_beta__1_3_1_4_glucanase_EC_3.2.1.73	1.39202e-05	3.88332e-11	2.54405e-06	6.15904e-06	6.22388e-12	1.01849e-06	0.0170162	0.0217968
undecaprenyl_phosphate_alpha__L_Ara4N_4_amino_4_deoxy_beta__L_arabinosyltransferase_EC_2.4.2.43	0.000123489	5.93042e-09	3.14389e-05	2.60211e-05	1.1458e-09	1.38191e-05	0.0168681	0.0217968
xyloglucan_specific_endo_beta__1_4_glucanase___endo_xyloglucanase_EC_3.2.1.151	1.12544e-05	2.58953e-11	2.07747e-06	4.54964e-06	6.65037e-12	1.0528e-06	0.0155694	0.0217968
alpha__1_3_L_neoagarobiase___neoagarobiose_hydrolase_EC_3.2.1._	4.64823e-05	1.00318e-09	1.29305e-05	8.66209e-06	1.22903e-10	4.52592e-06	0.0191991	0.024173
alpha__1_3_L_neoagarooligosaccharide_hydrolase_EC_3.2.1._	4.64823e-05	1.00318e-09	1.29305e-05	8.66209e-06	1.22903e-10	4.52592e-06	0.0191991	0.024173
chondroitin_ABC_lyase_EC_4.2.2.20	0.000151391	2.02912e-09	1.83899e-05	7.74345e-05	2.37834e-09	1.99095e-05	0.0198588	0.0243542
chondroitin_AC_lyase_EC_4.2.2.5	0.000151391	2.02912e-09	1.83899e-05	7.74345e-05	2.37834e-09	1.99095e-05	0.0198588	0.0243542
hyaluronate_lyase_EC_4.2.2.1	0.000151391	2.02912e-09	1.83899e-05	7.74345e-05	2.37834e-09	1.99095e-05	0.0198588	0.0243542
xanthan_lyase_EC_4.2.2.12	0.000151391	2.02912e-09	1.83899e-05	7.74345e-05	2.37834e-09	1.99095e-05	0.0198588	0.0243542
beta__galactosidase_EC_3.2.1.23_	0.000827851	4.50796e-08	8.66791e-05	0.000590436	4.0362e-09	2.59365e-05	0.0228657	0.0276823
mannosylglycoprotein_endo_beta__mannosidase_EC_3.2.1.152	0.000827851	4.50796e-08	8.66791e-05	0.000590436	4.0362e-09	2.59365e-05	0.0228657	0.0276823
beta__1_3_glucan_synthase_EC_2.4.1.34	0.00231738	2.14275e-07	0.000188978	0.0017747	5.97135e-08	9.9761e-05	0.0262801	0.0290863
beta__1_4_mannan_synthase_EC_2.4.1._	0.00231738	2.14275e-07	0.000188978	0.0017747	5.97135e-08	9.9761e-05	0.0262801	0.0290863
beta__mannosylphosphodecaprenol_mannooligosaccharide_alpha__1_6_mannosyltransferase_EC_2.4.1.199	0.00231738	2.14275e-07	0.000188978	0.0017747	5.97135e-08	9.9761e-05	0.0262755	0.0290863
N_acetylgalactosaminyltransferase_EC_2.4.1._	0.00231738	2.14275e-07	0.000188978	0.0017747	5.97135e-08	9.9761e-05	0.0262986	0.0290863
N_acetylglucosaminyltransferase_EC_2.4.1._	0.00231738	2.14275e-07	0.000188978	0.0017747	5.97135e-08	9.9761e-05	0.0263125	0.0290863
UDP_Galf_galactofuranosyl_galactofuranosyl_rhamnosyl_N_acetylglucosaminyl_PP_decaprenol_beta__1_5_1_6_galactofuranosyltransferase_EC_2.4.1.288	0.00231738	2.14275e-07	0.000188978	0.0017747	5.97135e-08	9.9761e-05	0.0263356	0.0290863
UDP_Galf_rhamnopyranosyl_N_acetylglucosaminyl_PP_decaprenol_beta__1_4_1_5_galactofuranosyltransferase_EC_2.4.1.287	0.00231738	2.14275e-07	0.000188978	0.0017747	5.97135e-08	9.9761e-05	0.0262894	0.0290863
cellulose_synthase_EC_2.4.1.12	0.00231738	2.14275e-07	0.000188978	0.0017747	5.97135e-08	9.9761e-05	0.0263264	0.0290863
chitin_oligosaccharide_synthase_EC_2.4.1._	0.00231738	2.14275e-07	0.000188978	0.0017747	5.97135e-08	9.9761e-05	0.0263264	0.0290863
chitin_synthase_EC_2.4.1.16	0.00231738	2.14275e-07	0.000188978	0.0017747	5.97135e-08	9.9761e-05	0.0262986	0.0290863
dTDP_L_Rha_N_acetylglucosaminyl_PP_decaprenol_alpha__1_3_L_rhamnosyltransferase_EC_2.4.1.289	0.00231738	2.14275e-07	0.000188978	0.0017747	5.97135e-08	9.9761e-05	0.0263218	0.0290863
dolichyl_phosphate_beta__D_mannosyltransferase_EC_2.4.1.83	0.00231738	2.14275e-07	0.000188978	0.0017747	5.97135e-08	9.9761e-05	0.026294	0.0290863
dolichyl_phosphate_beta__glucosyltransferase_EC_2.4.1.117	0.00231738	2.14275e-07	0.000188978	0.0017747	5.97135e-08	9.9761e-05	0.0263171	0.0290863
endo_1_4_beta__xylanase_EC_3.2.1.8	1.95096e-05	1.20184e-11	1.4153e-06	1.40193e-05	1.50896e-11	1.58585e-06	0.024787	0.0290863
hyaluronan_synthase_EC_2.4.1.212	0.00231738	2.14275e-07	0.000188978	0.0017747	5.97135e-08	9.9761e-05	0.0262986	0.0290863
alpha__glucan_lyase_EC_4.2.2.13	0.000122106	1.41332e-09	1.53477e-05	7.71736e-05	5.92558e-10	9.93779e-06	0.0301227	0.0321609
alpha__xylosidase_EC_3.2.1.177	0.000122106	1.41332e-09	1.53477e-05	7.71736e-05	5.92558e-10	9.93779e-06	0.0301227	0.0321609
exo_beta__1_4_glucanase___cellodextrinase_EC_3.2.1.74	0.000180685	1.27303e-09	1.45661e-05	0.000141677	2.22527e-10	6.08998e-06	0.0295394	0.0321609
isomaltosyltransferase_EC_2.4.1._	0.000122106	1.41332e-09	1.53477e-05	7.71736e-05	5.92558e-10	9.93779e-06	0.0301227	0.0321609
oligosaccharide_alpha__1_4_glucosyltransferase_EC_2.4.1.161	0.000122106	1.41332e-09	1.53477e-05	7.71736e-05	5.92558e-10	9.93779e-06	0.0301412	0.0321609
sucrase_isomaltase_EC_3.2.1.48_EC_3.2.1.10	0.000122106	1.41332e-09	1.53477e-05	7.71736e-05	5.92558e-10	9.93779e-06	0.0301227	0.0321609
mannosylglycerate_alpha__mannosidase___mannosylglycerate_hydrolase_EC_3.2.1.170	0.000109505	1.66304e-09	1.66485e-05	6.23964e-05	5.72909e-10	9.77163e-06	0.0311412	0.0328567
processing_alpha__glucosidase_EC_3.2.1.106	0.000109505	1.66304e-09	1.66485e-05	6.23964e-05	5.72909e-10	9.77163e-06	0.0311366	0.0328567
alpha__1_3_1_4_L_fucosidase_EC_3.2.1.111	0.00038446	1.57654e-08	5.12598e-05	0.000228461	9.07995e-09	3.89015e-05	0.031963	0.0335363
heparin_lyase_EC_4.2.2.7	2.96151e-05	2.3313e-10	6.23338e-06	1.21819e-05	8.14764e-11	3.68502e-06	0.0327292	0.0341505
beta__1_4_mannooligosaccharide_phosphorylase_EC_2.4.1._	3.93384e-05	4.45551e-10	8.61734e-06	1.69255e-05	8.3406e-11	3.7284e-06	0.0337454	0.034826
1_beta__D_mannopyranosyl_4_D_glucopyranosephosphate_alpha__D_mannosyltransferase_EC_2.4.1.281	3.93384e-05	4.45551e-10	8.61734e-06	1.69255e-05	8.3406e-11	3.7284e-06	0.0337454	0.034826
alpha__1_4_glucan_phosphate_alpha__maltosyltransferase_EC_2.4.99.16	0.00110038	2.6097e-08	6.59508e-05	0.000931211	5.66786e-09	3.0735e-05	0.0378681	0.0350577
6?_P_sucrose_phosphorylase_EC_2.4.1._	0.00110038	2.6097e-08	6.59508e-05	0.000931211	5.66786e-09	3.0735e-05	0.0378403	0.0350577
amylosucrase_EC_2.4.1.4_	0.00110038	2.6097e-08	6.59508e-05	0.000931211	5.66786e-09	3.0735e-05	0.0378681	0.0350577
cyclomaltodextrin_glucanotransferase_EC_2.4.1.19	0.00110038	2.6097e-08	6.59508e-05	0.000931211	5.66786e-09	3.0735e-05	0.0378264	0.0350577
exo_beta__glucosaminidase_EC_3.2.1.165	0.000893022	5.0454e-08	9.17006e-05	0.000669876	3.96546e-09	2.57082e-05	0.0365903	0.0350577
glucodextranase_EC_3.2.1.70	0.00110061	2.61703e-08	6.60433e-05	0.000931224	5.66763e-09	3.07344e-05	0.0378079	0.0350577
isoamylase_EC_3.2.1.68	0.00110038	2.6097e-08	6.59508e-05	0.000931211	5.66786e-09	3.0735e-05	0.0378542	0.0350577
isomaltulose_synthase_EC_5.4.99.11	0.00110038	2.6097e-08	6.59508e-05	0.000931211	5.66786e-09	3.0735e-05	0.0378403	0.0350577
malto_oligosyltrehalose_synthase_EC_5.4.99.15	0.00110038	2.6097e-08	6.59508e-05	0.000931211	5.66786e-09	3.0735e-05	0.0378681	0.0350577
malto_oligosyltrehalose_trehalohydrolase_EC_3.2.1.141	0.00110038	2.6097e-08	6.59508e-05	0.000931211	5.66786e-09	3.0735e-05	0.037831	0.0350577
maltogenic_amylase_EC_3.2.1.133	0.00110038	2.6097e-08	6.59508e-05	0.000931211	5.66786e-09	3.0735e-05	0.0378171	0.0350577
maltohexaose_forming_alpha__amylase_EC_3.2.1.98	0.00110038	2.6097e-08	6.59508e-05	0.000931211	5.66786e-09	3.0735e-05	0.0378681	0.0350577
maltopentaose_forming_alpha__amylase_EC_3.2.1.__	0.00110038	2.6097e-08	6.59508e-05	0.000931211	5.66786e-09	3.0735e-05	0.0378681	0.0350577
maltotetraose_forming_alpha__amylase_EC_3.2.1.60	0.00110038	2.6097e-08	6.59508e-05	0.000931211	5.66786e-09	3.0735e-05	0.0378681	0.0350577
maltotriose_forming_alpha__amylase_EC_3.2.1.116	0.00110038	2.6097e-08	6.59508e-05	0.000931211	5.66786e-09	3.0735e-05	0.0378681	0.0350577
neopullulanase_EC_3.2.1.135	0.00110038	2.6097e-08	6.59508e-05	0.000931211	5.66786e-09	3.0735e-05	0.0378171	0.0350577
oligo_alpha__glucosidase_EC_3.2.1.10	0.00110038	2.6097e-08	6.59508e-05	0.000931211	5.66786e-09	3.0735e-05	0.0378681	0.0350577
pullulanase_EC_3.2.1.41	0.00110038	2.6097e-08	6.59508e-05	0.000931211	5.66786e-09	3.0735e-05	0.0378403	0.0350577
sucrose_phosphorylase_EC_2.4.1.7	0.00110038	2.6097e-08	6.59508e-05	0.000931211	5.66786e-09	3.0735e-05	0.0378542	0.0350577
trehalose_synthase_EC_5.4.99.16	0.00110038	2.6097e-08	6.59508e-05	0.000931211	5.66786e-09	3.0735e-05	0.037831	0.0350577
trehalose_6_phosphate_hydrolase_EC_3.2.1.93	0.00110038	2.6097e-08	6.59508e-05	0.000931211	5.66786e-09	3.0735e-05	0.0378542	0.0350577
UDP_Glc_glucosyllipopolysaccharide_alpha__1_2_glucosyltransferase_EC_2.4.1._	0.000157026	3.28219e-09	2.33887e-05	0.000103098	1.16025e-10	4.39744e-06	0.0423287	0.0379039
UDP_GlcA_xylan_alpha__glucuronyltransferase_EC_2.4.1._	0.000157026	3.28219e-09	2.33887e-05	0.000103098	1.16025e-10	4.39744e-06	0.0423472	0.0379039
glycogenin_glucosyltransferase_EC_2.4.1.186	0.000157026	3.28219e-09	2.33887e-05	0.000103098	1.16025e-10	4.39744e-06	0.0423287	0.0379039
homogalacturonan_alpha__1_4_galacturonosyltransferase_EC_2.4.1.43	0.000157026	3.28219e-09	2.33887e-05	0.000103098	1.16025e-10	4.39744e-06	0.0423287	0.0379039
inositol_1_alpha__galactosyltransferase_galactinol_synthase_EC_2.4.1.123	0.000157026	3.28219e-09	2.33887e-05	0.000103098	1.16025e-10	4.39744e-06	0.0423472	0.0379039
lipopolysaccharide_alpha__1_3_galactosyltransferase_EC_2.4.1.44	0.000157026	3.28219e-09	2.33887e-05	0.000103098	1.16025e-10	4.39744e-06	0.0423472	0.0379039
lipopolysaccharide_glucosyltransferase_1_EC_2.4.1.58	0.000157026	3.28219e-09	2.33887e-05	0.000103098	1.16025e-10	4.39744e-06	0.0423287	0.0379039
endo_beta__1_4_galactanase_EC_3.2.1.89	1.81363e-05	1.32645e-10	4.70186e-06	6.21556e-06	3.53234e-11	2.42636e-06	0.0438102	0.0390284
endo_beta__1_6_galactanase_EC_3.2.1.164	0.000186381	1.41472e-09	1.53554e-05	0.000149581	2.55899e-10	6.53068e-06	0.0471597	0.0418151
CAZy-- ec level: CH2 VS CJ1
Taxa	mean(CH2)	variance(CH2)	standard error(CH2)	mean(CJ1)	variance(CJ1)	standard error(CJ1)	p value	q value
alpha__1_2_L_fucosidase_EC_3.2.1.63	0.000160278	4.52242e-10	8.68181e-06	6.25501e-05	9.01144e-10	1.22552e-05	5.80046e-05	0.00054065
alpha__amylase_EC_3.2.1.1	0.00120425	2.28496e-08	6.17112e-05	0.000770906	1.38029e-08	4.79634e-05	0.000148492	0.00054065
alpha__glucosidase_EC_3.2.1.20	0.00153165	4.57518e-08	8.7323e-05	0.000951294	2.3267e-08	6.22723e-05	0.000218097	0.00054065
alpha__glucosyltransferase_EC_2.4.1.52	0.00128883	4.52948e-08	8.68858e-05	0.000639839	3.96864e-08	8.1329e-05	0.000187935	0.00054065
1_2_diacylglycerol_3_glucosyltransferase_EC_2.4.1.157	0.00128883	4.52948e-08	8.68858e-05	0.000639839	3.96864e-08	8.1329e-05	0.000187935	0.00054065
4_alpha__glucanotransferase_EC_2.4.1.25	0.00120425	2.28496e-08	6.17112e-05	0.000770906	1.38029e-08	4.79634e-05	0.000148492	0.00054065
GDP_Man_Man1GlcNAc2_PP_dolichol_alpha__1_3_mannosyltransferase_EC_2.4.1.132	0.00128883	4.52948e-08	8.68858e-05	0.000639839	3.96864e-08	8.1329e-05	0.000187935	0.00054065
GDP_Man_Man2GlcNAc2_PP_dolichol_alpha__1_6_mannosyltransferase_EC_2.4.1.257	0.00128883	4.52948e-08	8.68858e-05	0.000639839	3.96864e-08	8.1329e-05	0.000213457	0.00054065
GDP_Man_Man3GlcNAc2_PP_dolichol_Man4GlcNAc2_PP_dolichol_alpha__1_2_mannosyltransferase_EC_2.4.1.131	0.00128883	4.52948e-08	8.68858e-05	0.000639839	3.96864e-08	8.1329e-05	0.000187935	0.00054065
NDP_Glc_alpha__glucose_alpha__glucosyltransferase___alpha__alpha__trehalose_synthase_EC_2.4.1.245	0.00128883	4.52948e-08	8.68858e-05	0.000639839	3.96864e-08	8.1329e-05	0.000176334	0.00054065
UDP_Gal_alpha__galactosyltransferase_EC_2.4.1._	0.00128883	4.52948e-08	8.68858e-05	0.000639839	3.96864e-08	8.1329e-05	0.000183295	0.00054065
UDP_Glc_alpha__glucosyltransferase_EC_2.4.1._	0.00128883	4.52948e-08	8.68858e-05	0.000639839	3.96864e-08	8.1329e-05	0.000187935	0.00054065
UDP_GlcA_alpha__glucuronyltransferase_EC_2.4.1._	0.00128883	4.52948e-08	8.68858e-05	0.000639839	3.96864e-08	8.1329e-05	0.000174014	0.00054065
UDP_GlcNAc_2_deoxystreptamine_alpha__N_acetylglucosaminyltransferase_EC_2.4.1.283	0.00128883	4.52948e-08	8.68858e-05	0.000639839	3.96864e-08	8.1329e-05	0.000201856	0.00054065
UDP_GlcNAc_ribostamycin_alpha__N_acetylglucosaminyltransferase_EC_2.4.1.285	0.00128883	4.52948e-08	8.68858e-05	0.000639839	3.96864e-08	8.1329e-05	0.000201856	0.00054065
UDP_Xyl_alpha__xylosyltransferase_EC_2.4.2._	0.00128883	4.52948e-08	8.68858e-05	0.000639839	3.96864e-08	8.1329e-05	0.000211137	0.00054065
amylo_alpha__1_6_glucosidase_EC_3.2.1.33	0.00120661	2.26455e-08	6.14349e-05	0.000770185	1.41021e-08	4.84804e-05	0.000146172	0.00054065
branching_enzyme_EC_2.4.1.18	0.00120425	2.28496e-08	6.17112e-05	0.000770906	1.38029e-08	4.79634e-05	0.000148492	0.00054065
cyclomaltodextrinase_EC_3.2.1.54	0.00120425	2.28496e-08	6.17112e-05	0.000770906	1.38029e-08	4.79634e-05	0.000148492	0.00054065
digalactosyldiacylglycerol_synthase_EC_2.4.1.141	0.00128883	4.52948e-08	8.68858e-05	0.000639839	3.96864e-08	8.1329e-05	0.000180974	0.00054065
diglucosyl_diacylglycerol_synthase_EC_2.4.1.208	0.00128883	4.52948e-08	8.68858e-05	0.000639839	3.96864e-08	8.1329e-05	0.000176334	0.00054065
murein_polymerase_EC_2.4.1.129	0.0005206	4.09289e-09	2.6118e-05	0.000228824	7.54189e-09	3.54539e-05	2.78422e-05	0.00054065
phosphatidylinositol_alpha__mannosyltransferase_EC_2.4.1.57	0.00128883	4.52948e-08	8.68858e-05	0.000639839	3.96864e-08	8.1329e-05	0.000187935	0.00054065
sucrose_synthase_EC_2.4.1.13	0.00128883	4.52948e-08	8.68858e-05	0.000639839	3.96864e-08	8.1329e-05	0.000208817	0.00054065
sucrose_phosphate_synthase_EC_2.4.1.14	0.00128883	4.52948e-08	8.68858e-05	0.000639839	3.96864e-08	8.1329e-05	0.000185615	0.00054065
trehalose_phosphorylase_EC_2.4.1.231	0.00128883	4.52948e-08	8.68858e-05	0.000639839	3.96864e-08	8.1329e-05	0.000201856	0.00054065
Others	0.85582	0.000187321	0.00558751	0.906719	0.000337367	0.00749853	0.000215777	0.00054065
endo_1_4_beta__xylanase_EC_3.2.1.8	1.95096e-05	1.20184e-11	1.4153e-06	9.53419e-06	9.04604e-12	1.22787e-06	0.000234339	0.000560164
alpha__1_4_glucan_phosphate_alpha__maltosyltransferase_EC_2.4.99.16	0.00110038	2.6097e-08	6.59508e-05	0.000733333	9.28736e-09	3.93433e-05	0.000930394	0.00106733
beta__1_3_glucan_synthase_EC_2.4.1.34	0.00231738	2.14275e-07	0.000188978	0.00130836	6.28414e-08	0.00010234	0.000974478	0.00106733
beta__1_4_mannan_synthase_EC_2.4.1._	0.00231738	2.14275e-07	0.000188978	0.00130836	6.28414e-08	0.00010234	0.000974478	0.00106733
beta__mannosylphosphodecaprenol_mannooligosaccharide_alpha__1_6_mannosyltransferase_EC_2.4.1.199	0.00231738	2.14275e-07	0.000188978	0.00130836	6.28414e-08	0.00010234	0.000986079	0.00106733
6?_P_sucrose_phosphorylase_EC_2.4.1._	0.00110038	2.6097e-08	6.59508e-05	0.000733333	9.28736e-09	3.93433e-05	0.000921114	0.00106733
N_acetylgalactosaminyltransferase_EC_2.4.1._	0.00231738	2.14275e-07	0.000188978	0.00130836	6.28414e-08	0.00010234	0.000981439	0.00106733
N_acetylglucosaminyltransferase_EC_2.4.1._	0.00231738	2.14275e-07	0.000188978	0.00130836	6.28414e-08	0.00010234	0.00100464	0.00106733
UDP_Galf_galactofuranosyl_galactofuranosyl_rhamnosyl_N_acetylglucosaminyl_PP_decaprenol_beta__1_5_1_6_galactofuranosyltransferase_EC_2.4.1.288	0.00231738	2.14275e-07	0.000188978	0.00130836	6.28414e-08	0.00010234	0.00100232	0.00106733
UDP_Galf_rhamnopyranosyl_N_acetylglucosaminyl_PP_decaprenol_beta__1_4_1_5_galactofuranosyltransferase_EC_2.4.1.287	0.00231738	2.14275e-07	0.000188978	0.00130836	6.28414e-08	0.00010234	0.000979118	0.00106733
amylosucrase_EC_2.4.1.4_	0.00110038	2.6097e-08	6.59508e-05	0.000733333	9.28736e-09	3.93433e-05	0.000930394	0.00106733
cellulose_synthase_EC_2.4.1.12	0.00231738	2.14275e-07	0.000188978	0.00130836	6.28414e-08	0.00010234	0.00099768	0.00106733
chitin_oligosaccharide_synthase_EC_2.4.1._	0.00231738	2.14275e-07	0.000188978	0.00130836	6.28414e-08	0.00010234	0.00099768	0.00106733
chitin_synthase_EC_2.4.1.16	0.00231738	2.14275e-07	0.000188978	0.00130836	6.28414e-08	0.00010234	0.000986079	0.00106733
cyclomaltodextrin_glucanotransferase_EC_2.4.1.19	0.00110038	2.6097e-08	6.59508e-05	0.000733333	9.28736e-09	3.93433e-05	0.000909513	0.00106733
dTDP_L_Rha_N_acetylglucosaminyl_PP_decaprenol_alpha__1_3_L_rhamnosyltransferase_EC_2.4.1.289	0.00231738	2.14275e-07	0.000188978	0.00130836	6.28414e-08	0.00010234	0.000990719	0.00106733
dolichyl_phosphate_beta__D_mannosyltransferase_EC_2.4.1.83	0.00231738	2.14275e-07	0.000188978	0.00130836	6.28414e-08	0.00010234	0.000990719	0.00106733
dolichyl_phosphate_beta__glucosyltransferase_EC_2.4.1.117	0.00231738	2.14275e-07	0.000188978	0.00130836	6.28414e-08	0.00010234	0.00099536	0.00106733
endo_beta__N_acetylglucosaminidase_EC_3.2.1.96	0.000237861	1.77994e-09	1.72237e-05	0.000107895	2.64222e-09	2.0985e-05	0.000890951	0.00106733
glucodextranase_EC_3.2.1.70	0.00110061	2.61703e-08	6.60433e-05	0.000733333	9.28736e-09	3.93433e-05	0.000951276	0.00106733
hyaluronan_synthase_EC_2.4.1.212	0.00231738	2.14275e-07	0.000188978	0.00130836	6.28414e-08	0.00010234	0.000981439	0.00106733
isoamylase_EC_3.2.1.68	0.00110038	2.6097e-08	6.59508e-05	0.000733333	9.28736e-09	3.93433e-05	0.000907193	0.00106733
isomaltulose_synthase_EC_5.4.99.11	0.00110038	2.6097e-08	6.59508e-05	0.000733333	9.28736e-09	3.93433e-05	0.000914153	0.00106733
malto_oligosyltrehalose_synthase_EC_5.4.99.15	0.00110038	2.6097e-08	6.59508e-05	0.000733333	9.28736e-09	3.93433e-05	0.000930394	0.00106733
malto_oligosyltrehalose_trehalohydrolase_EC_3.2.1.141	0.00110038	2.6097e-08	6.59508e-05	0.000733333	9.28736e-09	3.93433e-05	0.000909513	0.00106733
maltogenic_amylase_EC_3.2.1.133	0.00110038	2.6097e-08	6.59508e-05	0.000733333	9.28736e-09	3.93433e-05	0.000914153	0.00106733
maltohexaose_forming_alpha__amylase_EC_3.2.1.98	0.00110038	2.6097e-08	6.59508e-05	0.000733333	9.28736e-09	3.93433e-05	0.000930394	0.00106733
maltopentaose_forming_alpha__amylase_EC_3.2.1.__	0.00110038	2.6097e-08	6.59508e-05	0.000733333	9.28736e-09	3.93433e-05	0.000930394	0.00106733
maltotetraose_forming_alpha__amylase_EC_3.2.1.60	0.00110038	2.6097e-08	6.59508e-05	0.000733333	9.28736e-09	3.93433e-05	0.000930394	0.00106733
maltotriose_forming_alpha__amylase_EC_3.2.1.116	0.00110038	2.6097e-08	6.59508e-05	0.000733333	9.28736e-09	3.93433e-05	0.000930394	0.00106733
neopullulanase_EC_3.2.1.135	0.00110038	2.6097e-08	6.59508e-05	0.000733333	9.28736e-09	3.93433e-05	0.000914153	0.00106733
oligo_alpha__glucosidase_EC_3.2.1.10	0.00110038	2.6097e-08	6.59508e-05	0.000733333	9.28736e-09	3.93433e-05	0.000930394	0.00106733
pullulanase_EC_3.2.1.41	0.00110038	2.6097e-08	6.59508e-05	0.000733333	9.28736e-09	3.93433e-05	0.000921114	0.00106733
sucrose_phosphorylase_EC_2.4.1.7	0.00110038	2.6097e-08	6.59508e-05	0.000733333	9.28736e-09	3.93433e-05	0.000921114	0.00106733
trehalose_synthase_EC_5.4.99.16	0.00110038	2.6097e-08	6.59508e-05	0.000733333	9.28736e-09	3.93433e-05	0.000930394	0.00106733
trehalose_6_phosphate_hydrolase_EC_3.2.1.93	0.00110038	2.6097e-08	6.59508e-05	0.000733333	9.28736e-09	3.93433e-05	0.000921114	0.00106733
endo_1_3_beta__xylanase_EC_3.2.1.32	1.34944e-05	2.22718e-11	1.92664e-06	3.81595e-06	6.36227e-12	1.02975e-06	0.00154988	0.00159594
tomatinase_EC_3.2.1._	1.34944e-05	2.22718e-11	1.92664e-06	3.81595e-06	6.36227e-12	1.02975e-06	0.00154988	0.00159594
alpha__1_4_N_acetylgalactosaminyltransferase_EC_2.4.1._	9.29901e-05	2.72335e-11	2.13047e-06	0.000143073	8.07836e-10	1.16034e-05	0.00178886	0.00169729
alpha__1_4_N_acetylglucosaminyltransferase_EC_2.4.1._	9.29901e-05	2.72335e-11	2.13047e-06	0.000143073	8.07836e-10	1.16034e-05	0.00180046	0.00169729
alpha__1_6_mannosyltransferase_EC_2.4.1._	9.29901e-05	2.72335e-11	2.13047e-06	0.000143073	8.07836e-10	1.16034e-05	0.00178886	0.00169729
GDP_Man_inositol_phosphorylceramide_transferase_EC_2.4.1._	9.29901e-05	2.72335e-11	2.13047e-06	0.000143073	8.07836e-10	1.16034e-05	0.00178886	0.00169729
UDP_Gal_beta__galactoside_alpha__1_4_galactosyltransferase_EC_2.4.1._	9.29901e-05	2.72335e-11	2.13047e-06	0.000143073	8.07836e-10	1.16034e-05	0.00178886	0.00169729
UDP_Gal_lactose_N_acetyl_lactosamine_alpha__1_4_galactosyltransferase_EC_2.4.1._	9.29901e-05	2.72335e-11	2.13047e-06	0.000143073	8.07836e-10	1.16034e-05	0.00178886	0.00169729
alpha__1_3_glucosidase_EC_3.2.1.84	0.000231612	4.43204e-09	2.71786e-05	0.00011076	7.4514e-10	1.11441e-05	0.00251508	0.00233802
lysozyme_EC_3.2.1.17	0.00117146	1.01945e-07	0.000130349	0.000601538	1.40853e-08	4.84515e-05	0.00262181	0.00240385
alpha__mannosidase_EC_3.2.1.24	0.000609101	4.79022e-08	8.93515e-05	0.000209006	1.36289e-08	4.76601e-05	0.00309281	0.00279737
N_acetyl_beta__glucosaminidase_EC_3.2.1.52	0.000145968	4.84203e-09	2.84078e-05	3.22605e-05	2.4121e-10	6.34048e-06	0.00328074	0.00289131
protein_3_O_GlcNAc_L_Ser_Thr_beta__N_acetylglucosaminidase_EC_3.2.1.169	0.000145968	4.84203e-09	2.84078e-05	3.22605e-05	2.4121e-10	6.34048e-06	0.00328306	0.00289131
hyaluronidase_EC_3.2.1.35	0.000277371	1.95751e-08	5.71185e-05	5.67919e-05	5.88889e-10	9.90698e-06	0.00413689	0.00350491
mannosyl_oligosaccharide_alpha__1_2_mannosidase_EC_3.2.1.113	0.000486995	3.87574e-08	8.03715e-05	0.00014945	8.3281e-09	3.72561e-05	0.00412297	0.00350491
mannosyl_oligosaccharide_alpha__1_3_mannosidase_EC_3.2.1._	0.000486995	3.87574e-08	8.03715e-05	0.00014945	8.3281e-09	3.72561e-05	0.00412065	0.00350491
cellobiohydrolase_EC_3.2.1.91	1.12544e-05	2.58953e-11	2.07747e-06	3.22755e-06	1.3374e-12	4.72124e-07	0.00438979	0.0035831
endo_beta__1_34_glucanase___lichenase_laminarinase_EC_3.2.1.6	1.12544e-05	2.58953e-11	2.07747e-06	3.22755e-06	1.3374e-12	4.72124e-07	0.00438979	0.0035831
xyloglucan_specific_endo_beta__1_4_glucanase___endo_xyloglucanase_EC_3.2.1.151	1.12544e-05	2.58953e-11	2.07747e-06	3.22755e-06	1.3374e-12	4.72124e-07	0.00438979	0.0035831
alpha__L_fucosidase_EC_3.2.1.51	0.000544739	2.04716e-08	5.84117e-05	0.000245191	1.78187e-08	5.44957e-05	0.00449884	0.00362787
exo_alpha__1_6_mannosidase_EC_3.2.1._	6.78992e-05	5.47128e-10	9.54924e-06	2.76847e-05	1.78832e-10	5.45943e-06	0.00534339	0.00425762
alpha__1_2_L_arabinofuranosidase_EC_3.2.1._	0.000135364	1.10948e-09	1.35983e-05	7.91362e-05	4.3969e-10	8.56047e-06	0.00709977	0.0046818
beta__1_3_xylosidase_EC_3.2.1._	0.000135364	1.10948e-09	1.35983e-05	7.91362e-05	4.3969e-10	8.56047e-06	0.00709977	0.0046818
beta__1_6_N_acetylglucosaminidase_EC_3.2.1._	0.000766262	1.47893e-07	0.000156999	0.000205727	1.0805e-08	4.24362e-05	0.00755452	0.0046818
beta__6_SO3_N_acetylglucosaminidase_EC_3.2.1._	0.000766262	1.47893e-07	0.000156999	0.000205727	1.0805e-08	4.24362e-05	0.00754756	0.0046818
beta__agarase_EC_3.2.1.81	0.000131403	5.60734e-09	3.05705e-05	2.46319e-05	8.35906e-11	3.73253e-06	0.00743619	0.0046818
beta__hexosaminidase_EC_3.2.1.52	0.000766262	1.47893e-07	0.000156999	0.000205727	1.0805e-08	4.24362e-05	0.00754988	0.0046818
beta__porphyranase_EC_3.2.1.178	0.000131403	5.60734e-09	3.05705e-05	2.46319e-05	8.35906e-11	3.73253e-06	0.00743619	0.0046818
kappa__carrageenase_EC_3.2.1.83	0.000131403	5.60734e-09	3.05705e-05	2.45314e-05	8.24462e-11	3.70689e-06	0.00740139	0.0046818
inverting_exo_alpha__1_5_L_arabinanase_EC_3.2.1._	0.000135364	1.10948e-09	1.35983e-05	7.91362e-05	4.3969e-10	8.56047e-06	0.00710905	0.0046818
arabinanase_EC_3.2.1.99	0.000135364	1.10948e-09	1.35983e-05	7.91362e-05	4.3969e-10	8.56047e-06	0.00710905	0.0046818
chitin_beta__1_6_glucanosyltransferase_EC_2.4.1._	0.000131403	5.60734e-09	3.05705e-05	2.45314e-05	8.24462e-11	3.70689e-06	0.00740139	0.0046818
endo_beta__1_3_galactanase_EC_3.2.1.181	0.000131403	5.60734e-09	3.05705e-05	2.45314e-05	8.24462e-11	3.70689e-06	0.00740139	0.0046818
endo_beta__1_4_galactosidase_EC_3.2.1._	0.000131403	5.60734e-09	3.05705e-05	2.45314e-05	8.24462e-11	3.70689e-06	0.00740139	0.0046818
endo_1_34_beta__glucanase_EC_3.2.1.6	0.000131403	5.60734e-09	3.05705e-05	2.45314e-05	8.24462e-11	3.70689e-06	0.00740139	0.0046818
endo_1_3_beta__glucanase_EC_3.2.1.39	0.000131403	5.60734e-09	3.05705e-05	2.45314e-05	8.24462e-11	3.70689e-06	0.00740139	0.0046818
exo_alpha__1_5_L_arabinofuranosidase_EC_3.2.1._	0.000135364	1.10948e-09	1.35983e-05	7.91362e-05	4.3969e-10	8.56047e-06	0.00709977	0.0046818
galactan_1_3_beta__galactosidase_EC_3.2.1.145	0.000135364	1.10948e-09	1.35983e-05	7.91362e-05	4.3969e-10	8.56047e-06	0.00710905	0.0046818
glycosphingolipid_beta__N_acetylgalactosaminidase_EC_3.2.1._	0.0001028	2.53917e-09	2.05717e-05	2.72455e-05	2.74993e-10	6.76994e-06	0.00718794	0.0046818
keratan_sulfate_endo_1_4_beta__galactosidase_EC_3.2.1.103	0.000131403	5.60734e-09	3.05705e-05	2.45314e-05	8.24462e-11	3.70689e-06	0.00740139	0.0046818
lacto_N_biosidase_EC_3.2.1.140	0.000766262	1.47893e-07	0.000156999	0.000205727	1.0805e-08	4.24362e-05	0.00754988	0.0046818
licheninase_EC_3.2.1.73	0.000306848	1.10599e-08	4.29338e-05	0.000147846	1.14401e-09	1.38083e-05	0.00690023	0.0046818
xylanase_EC_3.2.1.8	0.000135364	1.10948e-09	1.35983e-05	7.91362e-05	4.3969e-10	8.56047e-06	0.00709977	0.0046818
xyloglucanxyloglucosyltransferase_EC_2.4.1.207	0.000131403	5.60734e-09	3.05705e-05	2.45314e-05	8.24462e-11	3.70689e-06	0.00740139	0.0046818
xyloglucanase_EC_3.2.1.151	0.000135393	6.0575e-09	3.17739e-05	2.47553e-05	8.96998e-11	3.86652e-06	0.00748028	0.0046818
lipopolysaccharide_N_acetylglucosaminyltransferase_EC_2.4.1.56	0.00171318	1.44697e-07	0.000155294	0.00109208	5.23988e-08	9.34512e-05	0.00767285	0.00471151
alpha__N_acetylgalactosaminidase_EC_3.2.1.49	0.000350861	1.49654e-08	4.99422e-05	0.000169827	1.93057e-09	1.79377e-05	0.00775406	0.00471809
alpha__glucan_lyase_EC_4.2.2.13	0.000122106	1.41332e-09	1.53477e-05	5.95556e-05	7.27571e-10	1.10119e-05	0.00872158	0.00503332
alpha__xylosidase_EC_3.2.1.177	0.000122106	1.41332e-09	1.53477e-05	5.95556e-05	7.27571e-10	1.10119e-05	0.00872158	0.00503332
beta__galactosidase_EC_3.2.1.23_	0.000827851	4.50796e-08	8.66791e-05	0.000500246	1.4621e-08	4.93643e-05	0.00894664	0.00503332
GDP_L_Fuc_beta__LacNac_alpha__1_3_L_fucosyltransferase_EC_2.4.1._	8.39869e-05	2.71932e-09	2.1289e-05	1.34986e-05	3.846e-11	2.5318e-06	0.00888399	0.00503332
GDP_L_Fuc_galactoside_alpha__1_2_L_fucosyltransferase_EC_2.4.1.69	8.39869e-05	2.71932e-09	2.1289e-05	1.34986e-05	3.846e-11	2.5318e-06	0.00888399	0.00503332
isomaltosyltransferase_EC_2.4.1._	0.000122106	1.41332e-09	1.53477e-05	5.95556e-05	7.27571e-10	1.10119e-05	0.00872158	0.00503332
mannosylglycoprotein_endo_beta__mannosidase_EC_3.2.1.152	0.000827851	4.50796e-08	8.66791e-05	0.000500246	1.4621e-08	4.93643e-05	0.00894896	0.00503332
oligosaccharide_alpha__1_4_glucosyltransferase_EC_2.4.1.161	0.000122106	1.41332e-09	1.53477e-05	5.95556e-05	7.27571e-10	1.10119e-05	0.00872158	0.00503332
sucrase_isomaltase_EC_3.2.1.48_EC_3.2.1.10	0.000122106	1.41332e-09	1.53477e-05	5.95556e-05	7.27571e-10	1.10119e-05	0.00872158	0.00503332
mannosylglycerate_alpha__mannosidase___mannosylglycerate_hydrolase_EC_3.2.1.170	0.000109505	1.66304e-09	1.66485e-05	5.1204e-05	2.94877e-10	7.01044e-06	0.00986775	0.00545836
processing_alpha__glucosidase_EC_3.2.1.106	0.000109505	1.66304e-09	1.66485e-05	5.1204e-05	2.94877e-10	7.01044e-06	0.00986543	0.00545836
alpha__galactosidase_EC_3.2.1.22	0.000561021	3.80211e-08	7.96043e-05	0.000279178	8.14983e-09	3.68552e-05	0.010058	0.00547313
UDP_GalNAc_beta__1_4_N_acetylgalactosaminyltransferase_EC_2.4.1._	4.90871e-05	1.26425e-09	1.45158e-05	2.18291e-06	9.77992e-12	1.27671e-06	0.00999768	0.00547313
alpha__1_3_galactosidase_EC_3.2.1._	0.000132322	5.98361e-09	3.15795e-05	2.83784e-05	4.65878e-10	8.81172e-06	0.0111717	0.00603013
exo_beta__glucosaminidase_EC_3.2.1.165	0.000893022	5.0454e-08	9.17006e-05	0.000598122	2.10085e-09	1.87121e-05	0.0113295	0.00606637
Nod_factor_hydrolase_EC_3.2.1._	0.000185177	1.93062e-09	1.79379e-05	9.80503e-05	2.7435e-09	2.13834e-05	0.0119234	0.00633374
alpha__N_acetylglucosaminidase_EC_3.2.1.50	9.8543e-05	3.40742e-09	2.38307e-05	2.14411e-05	3.96606e-10	8.13025e-06	0.0132761	0.00697735
amylopullulanase_EC_3.2.1.41	0.00010387	2.28848e-09	1.95298e-05	3.75723e-05	5.35519e-10	9.44739e-06	0.0134478	0.00697735
exo_beta__1_4_glucanase___cellodextrinase_EC_3.2.1.74	0.000180685	1.27303e-09	1.45661e-05	0.000120824	1.02462e-09	1.30679e-05	0.013413	0.00697735
alpha__1_2_mannosidase_EC_3.2.1._	0.000444641	6.24045e-08	0.000101984	0.000117762	9.35373e-09	3.94836e-05	0.0144524	0.00715718
alpha__1_3_mannosidase_EC_3.2.1._	0.000444641	6.24045e-08	0.000101984	0.000117762	9.35373e-09	3.94836e-05	0.0144548	0.00715718
alpha__1_3_1_4_L_fucosidase_EC_3.2.1.111	0.00038446	1.57654e-08	5.12598e-05	0.000182641	1.11559e-08	4.31198e-05	0.0139142	0.00715718
alpha__1_4_mannosidase_EC_3.2.1._	0.000444641	6.24045e-08	0.000101984	0.000117762	9.35373e-09	3.94836e-05	0.0144548	0.00715718
N_acetylmuramidase_EC_3.2.1.17	9.00965e-05	2.82448e-09	2.16967e-05	2.10593e-05	3.88443e-10	8.04614e-06	0.0145429	0.00715718
mannosyl_1_phosphodiester_alpha__1_P_mannosidase_EC_3.2.1._	0.000444641	6.24045e-08	0.000101984	0.000117762	9.35373e-09	3.94836e-05	0.0144548	0.00715718
mannosyl_oligosaccharide_alpha__1_6_mannosidase_EC_3.2.1._	0.000444641	6.24045e-08	0.000101984	0.000117762	9.35373e-09	3.94836e-05	0.0144548	0.00715718
peptidoglycan_hydrolase_with_endo_beta__N_acetylglucosaminidase_specificity_EC_3.2.1._	0.000725508	1.10056e-07	0.000135435	0.000304738	9.96087e-09	4.07449e-05	0.0147935	0.00722736
2_keto_3_deoxynononic_acid_sialidase_EC_3.2.1._	0.000215189	1.22908e-08	4.526e-05	7.64962e-05	1.10895e-09	1.3595e-05	0.0155847	0.00745074
sialidase_or_neuraminidase_EC_3.2.1.18	0.000215189	1.22908e-08	4.526e-05	7.64962e-05	1.10895e-09	1.3595e-05	0.0155824	0.00745074
trans_sialidase_EC_2.4.1._	0.000215189	1.22908e-08	4.526e-05	7.64962e-05	1.10895e-09	1.3595e-05	0.0155847	0.00745074
alpha__L_arabinofuranosidase_EC_3.2.1.55	0.00135822	5.89075e-08	9.90854e-05	0.000910903	8.4095e-08	0.000118389	0.0166357	0.00789682
dodecaprenyl_phosphate_beta__galacturonic_acid_lipopolysaccharide_core_alpha__galacturonosyl_transferase_EC_2.4.1._	0.000123489	5.93042e-09	3.14389e-05	2.93528e-05	5.00427e-10	9.13261e-06	0.0173991	0.00814366
undecaprenyl_phosphate_alpha__L_Ara4N_4_amino_4_deoxy_beta__L_arabinosyltransferase_EC_2.4.2.43	0.000123489	5.93042e-09	3.14389e-05	2.93528e-05	5.00427e-10	9.13261e-06	0.0173991	0.00814366
glycogen_synthase_EC_2.4.1.11	8.5708e-05	2.07425e-09	1.85932e-05	2.74987e-05	4.3917e-10	8.55541e-06	0.0181624	0.0084419
UDP_3_0_acyl_N_acetylglucosamine_deacetylase_EC_3.5.1._	0.000317793	2.4203e-09	2.00844e-05	0.000228823	3.55427e-09	2.43388e-05	0.0188329	0.0086932
glucoamylase_EC_3.2.1.3	0.000149066	7.30433e-09	3.48911e-05	4.24395e-05	1.456e-09	1.55778e-05	0.0195963	0.0089836
beta__L_arabinopyranosidase_EC_3.2.1.88	5.8489e-05	1.42488e-09	1.54104e-05	1.51265e-05	6.79366e-11	3.36493e-06	0.0212877	0.00949876
galactangalactan_galactosyltransferase_EC_2.4.1._	5.8489e-05	1.42488e-09	1.54104e-05	1.51265e-05	6.79366e-11	3.36493e-06	0.0212877	0.00949876
isomalto_dextranase_EC_3.2.1.94	5.8489e-05	1.42488e-09	1.54104e-05	1.51265e-05	6.79366e-11	3.36493e-06	0.0212877	0.00949876
lichenase___endo_beta__1_3_1_4_glucanase_EC_3.2.1.73	1.39202e-05	3.88332e-11	2.54405e-06	5.79743e-06	1.31001e-11	1.47762e-06	0.0209861	0.00949876
endo_beta__1_6_galactanase_EC_3.2.1.164	0.000186381	1.41472e-09	1.53554e-05	0.000133211	8.66716e-10	1.20188e-05	0.0223248	0.00988665
mannosyl_glycoprotein_endo_beta__N_acetylglucosaminidase_EC_3.2.1.96	0.000540332	8.77657e-08	0.000120945	0.000206687	2.38557e-09	1.99398e-05	0.0224524	0.00988665
alpha__1_3_L_neoagarobiase___neoagarobiose_hydrolase_EC_3.2.1._	4.64823e-05	1.00318e-09	1.29305e-05	1.02172e-05	8.88773e-11	3.84875e-06	0.0240116	0.00997805
alpha__1_3_L_neoagarooligosaccharide_hydrolase_EC_3.2.1._	4.64823e-05	1.00318e-09	1.29305e-05	1.02172e-05	8.88773e-11	3.84875e-06	0.0240116	0.00997805
beta__1_3_mannanase_EC_3.2.1._	0.00016943	1.25192e-09	1.44448e-05	0.000117596	1.0182e-09	1.30269e-05	0.0247448	0.00997805
arabinoxylan_specific_endo_beta__1_4_xylanase_EC_3.2.1._	0.00016943	1.25192e-09	1.44448e-05	0.000117596	1.0182e-09	1.30269e-05	0.0247471	0.00997805
cellulose_beta__1_4_cellobiosidase_EC_3.2.1.91	0.00016943	1.25192e-09	1.44448e-05	0.000117596	1.0182e-09	1.30269e-05	0.0247471	0.00997805
chitosanase_EC_3.2.1.132	0.000175446	1.22428e-09	1.42845e-05	0.000123315	1.02104e-09	1.30451e-05	0.0235638	0.00997805
endo_beta__1_4_glucanase___cellulase_EC_3.2.1.4	0.00016943	1.25192e-09	1.44448e-05	0.000117596	1.0182e-09	1.30269e-05	0.0247471	0.00997805
endoglycoceramidase_EC_3.2.1.123	0.00016943	1.25192e-09	1.44448e-05	0.000117596	1.0182e-09	1.30269e-05	0.0247471	0.00997805
glucan_beta__1_3_glucosidase_EC_3.2.1.58	0.00016943	1.25192e-09	1.44448e-05	0.000117596	1.0182e-09	1.30269e-05	0.0247471	0.00997805
glucan_endo_1_6_beta__glucosidase_EC_3.2.1.75	0.00016943	1.25192e-09	1.44448e-05	0.000117596	1.0182e-09	1.30269e-05	0.0247471	0.00997805
hesperidin_6_O_alpha__L_rhamnosyl_beta__glucosidase_EC_3.2.1.168	0.00016943	1.25192e-09	1.44448e-05	0.000117596	1.0182e-09	1.30269e-05	0.0247471	0.00997805
mannan_endo_beta__1_4_mannosidase_EC_3.2.1.78	0.00016943	1.25192e-09	1.44448e-05	0.000117596	1.0182e-09	1.30269e-05	0.0247471	0.00997805
mannan_transglycosylase_EC_2.4.1._	0.00016943	1.25192e-09	1.44448e-05	0.000117596	1.0182e-09	1.30269e-05	0.0247471	0.00997805
xyloglucan_specific_endo_beta__1_4_glucanase_EC_3.2.1.151	0.00016943	1.25192e-09	1.44448e-05	0.000117596	1.0182e-09	1.30269e-05	0.0247471	0.00997805
beta__1_3_galactosyl_O_glycosyl_glycoprotein_beta__1_6_N_acetylglucosaminyltransferase_EC_2.4.1.102	6.1306e-05	7.62667e-10	1.12744e-05	2.44272e-05	4.19828e-10	8.36489e-06	0.0263921	0.0103909
N_acetyllactosaminide_beta__1_6_N_acetylglucosaminyltransferase_EC_2.4.1.150	6.1306e-05	7.62667e-10	1.12744e-05	2.44272e-05	4.19828e-10	8.36489e-06	0.0263921	0.0103909
UDP_GlcAarabinogalactan_beta__glucuronosyltransferase_EC_2.4.1._	6.1306e-05	7.62667e-10	1.12744e-05	2.44272e-05	4.19828e-10	8.36489e-06	0.0263921	0.0103909
protein_O_beta__xylosyltransferase_EC_2.4.2.26	6.1306e-05	7.62667e-10	1.12744e-05	2.44272e-05	4.19828e-10	8.36489e-06	0.0263921	0.0103909
beta__galactoside_alpha__2_3_sialyltransferase_EC_2.4.99.4	8.1536e-07	1.86163e-12	5.5702e-07	2.66793e-06	1.39954e-12	4.82966e-07	0.0331021	0.0124347
beta__galactoside_alpha__2_6_sialyltransferase_EC_2.4.99.1	8.1536e-07	1.86163e-12	5.5702e-07	2.66793e-06	1.39954e-12	4.82966e-07	0.0331021	0.0124347
endo_xylogalacturonan_hydrolase_EC_3.2.1._	0.000231783	5.42197e-10	9.50611e-06	0.000156532	4.86111e-09	2.84637e-05	0.0332413	0.0124347
exo_polygalacturonase_EC_3.2.1.67	0.000231783	5.42197e-10	9.50611e-06	0.000156532	4.86111e-09	2.84637e-05	0.0332506	0.0124347
exo_polygalacturonosidase_EC_3.2.1.82	0.000231783	5.42197e-10	9.50611e-06	0.000156532	4.86111e-09	2.84637e-05	0.0332483	0.0124347
polygalacturonase_EC_3.2.1.15	0.000231783	5.42197e-10	9.50611e-06	0.000156532	4.86111e-09	2.84637e-05	0.0332506	0.0124347
rhamnogalacturonan_alpha__1_2_galacturonohydrolase_EC_3.2.1.173	0.000231783	5.42197e-10	9.50611e-06	0.000156532	4.86111e-09	2.84637e-05	0.0332552	0.0124347
rhamnogalacturonan_alpha__L_rhamnopyranohydrolase_EC_3.2.1.174	0.000231783	5.42197e-10	9.50611e-06	0.000156532	4.86111e-09	2.84637e-05	0.0332459	0.0124347
rhamnogalacturonase_EC_3.2.1.171	0.000231783	5.42197e-10	9.50611e-06	0.000156532	4.86111e-09	2.84637e-05	0.0332413	0.0124347
peptidoglycan_lytic_transglycosylase_EC_3.2.1._	2.50921e-06	8.21873e-12	1.17038e-06	7.77992e-06	1.89226e-11	1.77589e-06	0.0347912	0.0129368
chondroitin_ABC_lyase_EC_4.2.2.20	0.000151391	2.02912e-09	1.83899e-05	7.51193e-05	3.78162e-09	2.51052e-05	0.0364362	0.0132539
chondroitin_AC_lyase_EC_4.2.2.5	0.000151391	2.02912e-09	1.83899e-05	7.51193e-05	3.78162e-09	2.51052e-05	0.0364362	0.0132539
hyaluronate_lyase_EC_4.2.2.1	0.000151391	2.02912e-09	1.83899e-05	7.51193e-05	3.78162e-09	2.51052e-05	0.0364362	0.0132539
xanthan_lyase_EC_4.2.2.12	0.000151391	2.02912e-09	1.83899e-05	7.51193e-05	3.78162e-09	2.51052e-05	0.0364362	0.0132539
beta__galactosidase_EC_3.2.1.23	0.000322203	1.57794e-08	5.12826e-05	0.000525737	2.7733e-08	6.79865e-05	0.0398399	0.0144137
oligoxyloglucan_reducing_end_specific_cellobiohydrolase_EC_3.2.1.150	3.99092e-06	1.49024e-11	1.57599e-06	2.23835e-07	1.76807e-13	1.71662e-07	0.0407425	0.014661
lipid_A_disaccharide_synthase_EC_2.4.1.182	0.000200178	9.1434e-09	3.90372e-05	0.000101319	1.5409e-09	1.60255e-05	0.0423805	0.0151689
CAZy--level 2: CH2 VS CH3
Taxa	mean(CH2)	variance(CH2)	standard error(CH2)	mean(CH3)	variance(CH3)	standard error(CH3)	p value	q value
CBM13	9.55e-05	3.65e-09	2.47e-05	0.000207922	5.31e-09	2.97e-05	0.0117351	0.0379679
CBM20	0.000131513	5.79e-09	3.11e-05	3.36e-05	7.46e-10	1.11e-05	0.0103568	0.03781
CBM23	0	0	0	6.97e-07	3.6e-13	2.45e-07	0.013	0.0379679
Others	0.975826	8.22e-06	0.00117038	0.98167	1.69e-06	0.00053005	0.000508108	0.00847991
CBM27	0	0	0	6.97e-07	3.6e-13	2.45e-07	0.013	0.0379679
CBM37	3.8e-06	2.44e-11	2.02e-06	1.84e-05	1.13e-10	4.33e-06	0.00883243	0.0349631
CBM9	7.48e-05	1.96e-09	1.81e-05	1.76e-05	3.32e-10	7.44e-06	0.0113297	0.0379679
CE11	0.000363162	3.22e-09	2.32e-05	0.000240684	4.46e-09	2.73e-05	0.00434054	0.0298283
CE14	1.48e-05	2.67e-11	2.11e-06	3.16e-05	1.03e-10	4.13e-06	0.00284324	0.0252593
CE15	1.42e-06	7.73e-13	3.59e-07	6.11e-06	5.4e-12	9.49e-07	0.000454054	0.00847991
GH1	0.000278837	1.52e-08	5.04e-05	0.000559173	2.76e-08	6.79e-05	0.00538378	0.0336882
GH108	0.000103504	3.78e-09	2.51e-05	2.22e-05	2.98e-10	7.05e-06	0.00787568	0.0349631
GH109	0.000246035	2.04e-08	5.84e-05	4.95e-05	2.93e-09	2.21e-05	0.00747568	0.0349631
GH110	0.000152041	8.02e-09	3.66e-05	3.23e-05	1.3e-09	1.47e-05	0.00897838	0.0349631
GH117	5.34e-05	1.35e-09	1.5e-05	9.72e-06	1.57e-10	5.11e-06	0.0158811	0.0441737
GH123	0.000118003	3.45e-09	2.4e-05	3.56e-05	4.36e-10	8.53e-06	0.00627027	0.0336882
GH125	7.77e-05	7.37e-10	1.11e-05	2.3e-05	1.12e-10	4.32e-06	0.000475676	0.00847991
GH133	0.000121945	4.01e-09	2.59e-05	3.68e-05	6.49e-10	1.04e-05	0.00872432	0.0349631
GH16	0.000150894	7.52e-09	3.54e-05	3.17e-05	6.91e-10	1.07e-05	0.00643784	0.0336882
GH2	0.000948118	6.42e-08	0.000103419	0.000659183	5.64e-09	3.07e-05	0.0183189	0.0497696
GH20	0.000879846	2e-07	0.000182734	0.000316278	3.19e-08	7.29e-05	0.0125243	0.0379679
GH27	6.73e-05	1.92e-09	1.79e-05	1.41e-05	1.51e-10	5.02e-06	0.0125946	0.0379679
GH33	0.000247108	1.66e-08	5.26e-05	7.05e-05	1.33e-09	1.49e-05	0.00632432	0.0336882
GH51	2.17e-05	2.26e-10	6.13e-06	5.59e-05	1.28e-11	1.46e-06	0.000124324	0.00363102
GH57	0.000119171	3.1e-09	2.27e-05	3.08e-05	5.22e-10	9.32e-06	0.00310811	0.0252593
GH84	0.000167547	6.59e-09	3.31e-05	3.54e-05	1.43e-09	1.54e-05	0.00303243	0.0252593
GH85	6.03e-05	7.18e-10	1.09e-05	1.22e-05	7.88e-11	3.62e-06	0.000924324	0.0134979
GH9	1.29e-05	3.53e-11	2.43e-06	5.09e-06	8.5e-12	1.19e-06	0.0120216	0.0379679
GH92	0.000510746	8.4e-08	0.000118297	0.000126757	1.46e-08	4.93e-05	0.00977838	0.0368501
GH95	0.000183288	6.8e-10	1.06e-05	8.55e-05	9.51e-10	1.26e-05	8.11e-05	0.00315741
GH97	0.000170985	9.79e-09	4.04e-05	3.98e-05	1.35e-09	1.5e-05	0.00893514	0.0349631
GT1	2.66e-05	2.76e-10	6.78e-06	8.08e-05	2.15e-10	5.98e-06	7.57e-05	0.00315741
GT11	9.65e-05	3.63e-09	2.46e-05	1.67e-05	3.35e-10	7.47e-06	0.00808649	0.0349631
GT19	0.0002295	1.22e-08	4.5e-05	5.45e-05	2.27e-09	1.94e-05	0.00324324	0.0252593
GT26	0.000148737	1.47e-09	1.56e-05	0.000213758	8.93e-10	1.22e-05	0.00588108	0.0336882
GT3	9.84e-05	2.78e-09	2.15e-05	2.43e-05	4.32e-10	8.49e-06	0.00663243	0.0336882
GT30	0.000230274	1.06e-08	4.2e-05	5.73e-05	2.23e-09	1.93e-05	0.00234054	0.0248574
GT4	0.00147389	6.43e-08	0.00010349	0.00102279	1.33e-08	4.7e-05	0.00143784	0.0186638
GT5	0.000277574	6.08e-10	1.01e-05	0.000344173	1.54e-09	1.6e-05	0.00348649	0.0254566
GT51	0.000595358	6.32e-09	3.25e-05	0.00031494	2.41e-09	2e-05	2.7e-05	0.00315741
GT83	0.000141969	7.96e-09	3.64e-05	2.92e-05	1.46e-09	1.56e-05	0.012973	0.0379679
GT87	2.67e-06	2.77e-12	6.79e-07	1.45e-05	5.48e-11	3.02e-06	0.00198378	0.0231754
PL8	0.000173387	2.82e-09	2.17e-05	8.66e-05	3.03e-09	2.25e-05	0.0155351	0.0441737
CAZy--level 2: CH2 VS CJ1
Taxa	mean(CH2)	variance(CH2)	standard error(CH2)	mean(CJ1)	variance(CJ1)	standard error(CJ1)	p value	q value
CBM50	0.00143477	2.60429e-08	6.58824e-05	0.000724056	3.21605e-08	7.32125e-05	2.76243e-05	0.00252475
CBM32	0.000250815	3.28436e-09	2.33964e-05	7.87787e-05	3.61282e-10	7.75974e-06	6.07735e-05	0.00262574
GH95	0.000183288	6.79864e-10	1.06448e-05	6.85222e-05	1.11872e-09	1.36548e-05	0.000143646	0.00262574
GT51	0.000595358	6.32261e-09	3.24618e-05	0.00025021	9.51271e-09	3.98177e-05	0.000121547	0.00262574
Others	0.975826	8.21871e-06	0.00117038	0.985348	3.3255e-06	0.00074448	9.94475e-05	0.00262574
GT4	0.00147389	6.42613e-08	0.00010349	0.000699509	5.16477e-08	9.2779e-05	0.000337017	0.00513365
GH13	0.00125717	3.42827e-08	7.55896e-05	0.000799518	1.39613e-08	4.82378e-05	0.000569061	0.00742997
GT2	0.00265228	3.09667e-07	0.000227181	0.00142758	8.70488e-08	0.00012045	0.000955801	0.0109195
GH24	0.000156905	2.92222e-09	2.20689e-05	4.29339e-05	8.56956e-10	1.1951e-05	0.00127072	0.0120178
GH85	6.03393e-05	7.18119e-10	1.09401e-05	1.06959e-05	4.82908e-12	8.97132e-07	0.00131492	0.0120178
GH10	1.54656e-05	3.0782e-11	2.26503e-06	4.19253e-06	7.77108e-12	1.13806e-06	0.00144751	0.012027
GT32	0.000106242	4.21981e-11	2.65198e-06	0.000155236	7.80483e-10	1.14053e-05	0.00204972	0.0156114
GH84	0.000167547	6.58635e-09	3.31319e-05	3.519e-05	2.96724e-10	7.03235e-06	0.00331492	0.0233054
GH125	7.77452e-05	7.36826e-10	1.10817e-05	3.02745e-05	2.20619e-10	6.06381e-06	0.00425414	0.0259207
GH9	1.28981e-05	3.53364e-11	2.42681e-06	3.5141e-06	1.61304e-12	5.18498e-07	0.00404972	0.0259207
CE11	0.000363162	3.21781e-09	2.31582e-05	0.000248074	3.66535e-09	2.47162e-05	0.0070884	0.0286769
GH109	0.000246035	2.0429e-08	5.83509e-05	4.59441e-05	9.81493e-10	1.27899e-05	0.00753039	0.0286769
GH123	0.000118003	3.45048e-09	2.39808e-05	2.98116e-05	3.37358e-10	7.49843e-06	0.00619337	0.0286769
GH16	0.000150894	7.52019e-09	3.54029e-05	2.67518e-05	1.02916e-10	4.14158e-06	0.00646961	0.0286769
GH2	0.000948118	6.41731e-08	0.000103419	0.000546327	1.97004e-08	5.7301e-05	0.0070663	0.0286769
GH20	0.000879846	2.00349e-07	0.000182734	0.000225257	1.34246e-08	4.73015e-05	0.00656906	0.0286769
GH31	0.000139775	1.9125e-09	1.78536e-05	6.51059e-05	9.00632e-10	1.22517e-05	0.00665193	0.0286769
GH43	0.000154973	1.5728e-09	1.61906e-05	8.63215e-05	5.62393e-10	9.68154e-06	0.00510497	0.0286769
GH63	0.000125555	2.29049e-09	1.95384e-05	5.54804e-05	3.17963e-10	7.27969e-06	0.00743646	0.0286769
GH18	0.000211776	2.66304e-09	2.10675e-05	0.000107326	3.37583e-09	2.372e-05	0.00818232	0.0287627
GT11	9.64976e-05	3.62507e-09	2.45801e-05	1.47809e-05	4.84743e-11	2.84237e-06	0.00806077	0.0287627
CBM42	6.90841e-07	1.59822e-13	1.63208e-07	1.34311e-07	1.58032e-14	5.13212e-08	0.00870166	0.0291478
CBM9	7.4826e-05	1.96236e-09	1.80848e-05	1.36189e-05	1.78756e-10	5.45827e-06	0.00896133	0.0291478
GT82	5.60978e-05	1.65091e-09	1.65877e-05	2.32411e-06	1.10323e-11	1.35599e-06	0.00924862	0.0291478
GH110	0.000152041	8.02209e-09	3.65652e-05	3.11072e-05	5.67367e-10	9.72425e-06	0.00967403	0.0294722
GH29	0.00044064	2.2e-08	6.0553e-05	0.000200493	1.38025e-08	4.79627e-05	0.0107017	0.0301133
GH57	0.000119171	3.09617e-09	2.27163e-05	4.11984e-05	6.58923e-10	1.04795e-05	0.0105912	0.0301133
GH89	0.000113235	4.56992e-09	2.75981e-05	2.35309e-05	4.80429e-10	8.94827e-06	0.0108729	0.0301133
GH108	0.000103504	3.77692e-09	2.50896e-05	2.31726e-05	4.6998e-10	8.85043e-06	0.0119061	0.0310905
GH92	0.000510746	8.39648e-08	0.000118297	0.000129361	1.1355e-08	4.35028e-05	0.0118232	0.0310905
GH33	0.000247108	1.65887e-08	5.25813e-05	8.37065e-05	1.38765e-09	1.52077e-05	0.0126188	0.0320362
GH133	0.000121945	4.01278e-09	2.58611e-05	4.04334e-05	7.30367e-10	1.1033e-05	0.0143039	0.0335209
GT3	9.83735e-05	2.77901e-09	2.15213e-05	3.02197e-05	5.35421e-10	9.44652e-06	0.0142818	0.0335209
GT83	0.000141969	7.95649e-09	3.64154e-05	3.22029e-05	6.09499e-10	1.00788e-05	0.0141823	0.0335209
CBM62	1.90332e-05	2.01982e-10	5.80204e-06	2.26311e-06	3.85065e-12	8.01108e-07	0.015326	0.0341641
GH5	0.000193855	1.77157e-09	1.71832e-05	0.000128429	1.35188e-09	1.50104e-05	0.0151271	0.0341641
CBM20	0.000131513	5.78683e-09	3.10559e-05	3.7032e-05	8.57076e-10	1.19518e-05	0.0158398	0.0341956
GH97	0.000170985	9.79062e-09	4.03952e-05	4.66652e-05	1.76208e-09	1.71371e-05	0.0160884	0.0341956
CBM6	2.17699e-05	1.69589e-10	5.31647e-06	5.51987e-06	3.53941e-11	2.42879e-06	0.0174254	0.034305
CE9	0.000372109	1.57014e-09	1.61768e-05	0.000321162	4.68728e-10	8.83863e-06	0.0178785	0.034305
GH27	6.72515e-05	1.91844e-09	1.78813e-05	1.65552e-05	8.407e-11	3.74322e-06	0.0176188	0.034305
GH28	0.000264857	7.69095e-10	1.13218e-05	0.000171474	6.10769e-09	3.19053e-05	0.0180166	0.034305
GH73	0.000617401	1.14662e-07	0.00013824	0.000225581	3.14968e-09	2.29117e-05	0.0169337	0.034305
GH117	5.34499e-05	1.34614e-09	1.49785e-05	1.12293e-05	1.07612e-10	4.23501e-06	0.019326	0.0349306
GT14	7.03007e-05	1.02845e-09	1.30923e-05	2.69118e-05	5.11822e-10	9.236e-06	0.0194917	0.0349306
PL8	0.000173387	2.82002e-09	2.16796e-05	8.0722e-05	4.19077e-09	2.64284e-05	0.0193923	0.0349306
GH106	9.11975e-07	7.43391e-13	3.51992e-07	2.74672e-08	4.52667e-15	2.74672e-08	0.0265083	0.0465913
CBM35	7.80585e-05	2.00386e-09	1.8275e-05	2.76844e-05	5.07905e-10	9.20059e-06	0.0282099	0.0470429
CBM58	3.40897e-05	7.27359e-10	1.10103e-05	6.05683e-06	3.89283e-11	2.54716e-06	0.027326	0.0470429
GT19	0.0002295	1.21727e-08	4.5042e-05	0.000110396	1.89301e-09	1.77624e-05	0.0283094	0.0470429
GT80	9.19418e-07	2.34445e-12	6.25093e-07	2.9213e-06	1.75199e-12	5.40369e-07	0.0300608	0.0490612
